# Supplementary material for: Differentially Amplified Repetitive Sequences Among Aegilops tauschii Subspecies and Genotypes
Source: Frontiers journal article supplement (doi:10.3389/fpls.2021.716750), 2021-08-19
Supplement: Data_Sheet_1.zip [file Data_Sheet_1.zip]

## Sheet: Table S1
	Differentially amplified repetitive sequences among Aegilops tauschii genotypes and subspecies Rahman Ebrahimzadegan1, Fatemeh Orooji1, Pengtao Ma2, Ghader Mirzaghaderi1 1 Department of Agronomy and Plant Breeding, Faculty of Agriculture, University of Kurdistan, P. O. Box: 416, Sanandaj, Iran 2 College of Life Sciences, Yantai University, Yantai, Shandong 264005, China
Table S1. Ae. tauschii genotypes that their Illumina reads were used in this study. The data were originaly from Zhou et al. 2020.
genotype ID in the original study	genotype ID in this study	Accession number	Genus	Species	Subspecies	Origin country	Latitude	Longitude	Common name	Region
D012	A012	IG 46804	Aegilops	tauschii	Aegilops tauschii Coss. ssp. anathera	Turkey	40.0667	43.3	Anathera	WA
D013	A013	PI 560535	Aegilops	tauschii	Aegilops tauschii Coss. ssp. anathera	Turkey	37.7167	43.8	Anathera	WA
D017	A017	PI 554324	Aegilops	tauschii	Aegilops tauschii Coss. ssp. anathera	Turkey	40.1333	43.0667	Anathera	WA
D018	A018	PI 486273	Aegilops	tauschii	Aegilops tauschii Coss. ssp. anathera	Turkey	40.15	43.3667	Anathera	WA
D019	A019	PI 560533	Aegilops	tauschii	Aegilops tauschii Coss. ssp. anathera	Turkey	38.8667	43.4667	Anathera	WA
D021	A021	PI 560538	Aegilops	tauschii	Aegilops tauschii Coss. ssp. anathera	Turkey	38.4667	42.5	Anathera	WA
A024	A024	PI 554315	Aegilops	tauschii	Aegilops tauschii Coss. ssp. anathera	Turkey	38.4167	43.3	Anathera	WA
D027	A027	IG 111043	Aegilops	tauschii	Aegilops tauschii Coss. ssp. anathera	Syria	35.5256	38.7597	Anathera	WA
D029	A029	PI 554309	Aegilops	tauschii	Aegilops tauschii Coss. ssp. anathera	Turkey	38.4667	42.45	anathera	WA
D030	A030	IG 47259	Aegilops	tauschii	Aegilops tauschii Coss. ssp. anathera	Syria	35.5228	38.7572	anathera	WA
D002	M002	PI 511366	Aegilops	tauschii	Aegilops tauschii Coss. ssp. meyeri	Afghanistan	31.97	66.72	Meyeri	SCA
D003	M003	IG 48992	Aegilops	tauschii	Aegilops tauschii Coss. ssp. meyeri	China	34.2667	108.883	Meyeri	EA
D004	M004	PI 511362	Aegilops	tauschii	Aegilops tauschii Coss. ssp. meyeri	Pakistan	30.2	67	Meyeri	SCA
D005	M005	IG 48587	Aegilops	tauschii	Aegilops tauschii Coss. ssp. meyeri	Uzbekistan	38.3667	67.8667	Meyeri	SCA
D006	M006	IG 48976	Aegilops	tauschii	Aegilops tauschii Coss. ssp. meyeri	China	43.7833	87.5167	Meyeri	EA
D007	M007	IG 48554	Aegilops	tauschii	Aegilops tauschii Coss. ssp. meyeri	Tajikistan	39.4667	67.5	Meyeri	SCA
D008	M008	PI 220326	Aegilops	tauschii	Aegilops tauschii Coss. ssp. meyeri	Afghanistan	36.7	68.9	Meyeri	SCA
D011	M011	PI 317398	Aegilops	tauschii	Aegilops tauschii Coss. ssp. meyeri	Afghanistan	36.3167	67.8333	Meyeri	SCA
D025	M025	IG 46795	Aegilops	tauschii	Aegilops tauschii Coss. ssp. meyeri	Turkey	37.2667	44.6	Meyeri	WA
D020	M020	IG 46802	Aegilops	tauschii	Aegilops tauschii Coss. ssp. meyeri	Turkey	38.85	43.5333	Meyeri	WA
D001	S001	IG 132581	Aegilops	tauschii	Aegilops tauschii Coss. ssp. strangulata	Azerbaijan	38.9719	48.3347	Strangulata	WA
D010	S010	PI 603227	Aegilops	tauschii	Aegilops tauschii Coss. ssp. strangulata	Iran	36.8667	54.4833	Strangulata	WA
D014	S014	PI 560237	Aegilops	tauschii	Aegilops tauschii Coss. ssp. strangulata	Azerbaijan	41.2	47.1667	Strangulata	WA
D015	S015	PI 560755	Aegilops	tauschii	Aegilops tauschii Coss. ssp. strangulata	Turkey	37.3833	44.45	Strangulata	WA
D016	S016	IG 132685	Aegilops	tauschii	Aegilops tauschii Coss. ssp. strangulata	Azerbaijan	40.9167	47.4067	Strangulata	WA
D022	S022	PI 603234	Aegilops	tauschii	Aegilops tauschii Coss. ssp. strangulata	Azerbaijan	40.9833	47.8333	Strangulata	WA
D023	S023	PI 431600	Aegilops	tauschii	Aegilops tauschii Coss. ssp. strangulata	Russia	43	47	Strangulata	EU
D026	S026	PI 486266	Aegilops	tauschii	Aegilops tauschii Coss. ssp. strangulata	Turkey	37.2	44.6167	Strangulata	WA
D028	S028	IG 46623	Aegilops	tauschii	Aegilops tauschii Coss. ssp. strangulata	Syria	36.7189	40.1475	Strangulata	WA

## Sheet: Table S2
Table S2. Ae. tauschii accessions used in FISH analysis.
#	Accession	subspecies	Origin
1	G 307	tauschii	Iran
2	AE 235	tauschii var. meyeri	Russia
3	AE 265	strangulata	Armenia
4	AE277	tauschii var. meyeri	Afghanistan
5	AE 541	intermediate	Iran
6	G 299	strangulata	Iran
7	G 13938	intermediate	Iran
8	AE 1548	tauschii	Iran
9	AE 1600	strangulata	Iran
10	AE 1602	strangulata	Iran
11	AE 526	tauschii var. meyeri	Iran
12	AE 956	tauschii var. tauschii	Tajikistan
13	AE 1037	tauschii var. tauschii	Georgia
14	AE 1055	tauschii var. tauschii	Azerbaijan
15	AE 1068	tauschii var. meyeri (Griseb.) Tzvelev	Syria
16	AE 1650	subsp. tauschii var. tauschii	Iran
17	G 3675	subsp. tauschii var. tauschii	Unknown

## Sheet: Table S3
Table S3. Types and proportions of highly-repetitive sequences in Ae. tauschii characterised by annotating clusters representing at least 0.01% of the genome in RepeatExplorer2. The repeats are grouped according to their repeat class and lineage.
Annotation	Number_of_reads	Proportion[%]
All	137183	4.20592
All/repeat	253707	7.77845
All/repeat/mobile_element	36205	1.11002
All/repeat/mobile_element/Class_I/LINE	5005	0.153449
All/repeat/mobile_element/Class_I/LTR	8724	0.267471
All/repeat/mobile_element/Class_I/LTR/Ty1_copia/Ale	5153	0.157987
All/repeat/mobile_element/Class_I/LTR/Ty1_copia/Angela	365271	11.1989
All/repeat/mobile_element/Class_I/LTR/Ty1_copia/Bianca	508	0.0155749
All/repeat/mobile_element/Class_I/LTR/Ty1_copia/Ikeros	1078	0.0330506
All/repeat/mobile_element/Class_I/LTR/Ty1_copia/SIRE	106663	3.2702
All/repeat/mobile_element/Class_I/LTR/Ty1_copia/TAR	152394	4.67228
All/repeat/mobile_element/Class_I/LTR/Ty3_gypsy/chromovirus/CRM	45881	1.40667
All/repeat/mobile_element/Class_I/LTR/Ty3_gypsy/chromovirus/Reina	653	0.0200205
All/repeat/mobile_element/Class_I/LTR/Ty3_gypsy/chromovirus/Tekay	315455	9.6716
All/repeat/mobile_element/Class_I/LTR/Ty3_gypsy/non-chromovirus/OTA/Athila	411916	12.629
All/repeat/mobile_element/Class_I/LTR/Ty3_gypsy/non-chromovirus/OTA/Tat/Ogre	2221	0.0680941
All/repeat/mobile_element/Class_I/LTR/Ty3_gypsy/non-chromovirus/OTA/Tat/Retand	484548	14.8559
All/repeat/mobile_element/Class_II/Subclass_1/TIR/EnSpm_CACTA	55594	1.70447
All/repeat/mobile_element/Class_II/Subclass_1/TIR/MuDR_Mutator	5691	0.174481
All/repeat/mobile_element/Class_II/Subclass_1/TIR/PIF_Harbinger	5123	0.157067
All/repeat/rDNA/45S_rDNA	21468	0.658192
All/repeat/rDNA/5S_rDNA	3590	0.110067
All/repeat/satellite	98981	3.03468

## Sheet: Table S4
Table S4. The proportion of the identified repeat clusters and the number of reads in each accession.
Cluster	Proportion[%]	Proportion adjusted[%]	Number of reads	Similarity hits [above 0.1%]	LTR detection	Satellite probability	TAREAN annotation	Consensus length	TAREAN k-mer analysis	Connected component index C	Pair completeness index P	repeat count for each genotype
1	1.2	1.2	40715			0.937	Putative satellites (high confidence)	337	report	0.968	0.919	S014:914
												S015:1103
												S016:863
												S022:1050
												S023:859
												S001:937
												S010:1027
												S026:1124
												S028:1064
												M002:1587
												M003:1534
												M004:1327
												M005:1563
												M006:1387
												M007:1419
												M009:2956
												M011:1359
												M020:1518
												M025:1434
												A012:1517
												A013:2080
												A017:1732
												A018:1756
												A019:1389
												A021:1422
												A024:1274
												A027:1572
												A029:1444
												A030:1504
2	1	1	34611	7.73% Class_I/LTR/Ty3_gypsy/non-chromovirus/OTA/Tat/Retand:Ty3-GAG		1.39e-22	Other		N/A	0.000376	0.707	S014:1129
												S015:1287
												S016:1165
												S022:1163
												S023:1226
												S001:1156
												S010:1183
												S026:1176
												S028:1220
												M002:1116
												M003:1048
												M004:1216
												M005:1102
												M006:1072
												M007:1093
												M009:2351
												M011:1094
												M020:1067
												M025:1065
												A012:1250
												A013:1132
												A017:1172
												A018:1124
												A019:1155
												A021:1295
												A024:1172
												A027:1067
												A029:1086
												A030:1229
3	0.9	0.9	29920		Met Met Met Met Met Met Met Met	2.16e-21	Other		N/A	0.00969	0.661	S014:1030
												S015:1004
												S016:1004
												S022:929
												S023:1059
												S001:1082
												S010:1093
												S026:1111
												S028:1032
												M002:1073
												M003:988
												M004:956
												M005:989
												M006:963
												M007:939
												M009:2034
												M011:940
												M020:986
												M025:958
												A012:1068
												A013:916
												A017:985
												A018:1007
												A019:904
												A021:952
												A024:926
												A027:965
												A029:1017
												A030:1010
4	0.88	0.89	29483	0.17% organelle/mitochondria		3.69e-16	Other		N/A	0.122	0.67	S014:1122
												S015:1010
												S016:920
												S022:939
												S023:1035
												S001:973
												S010:1040
												S026:962
												S028:886
												M002:951
												M003:1053
												M004:951
												M005:990
												M006:1037
												M007:944
												M009:2081
												M011:1022
												M020:907
												M025:1044
												A012:1011
												A013:899
												A017:1016
												A018:992
												A019:966
												A021:945
												A024:977
												A027:931
												A029:992
												A030:887
5	0.86	0.86	28624			0.000969	Other		N/A	0.589	0.612	S014:1053
												S015:980
												S016:985
												S022:967
												S023:1046
												S001:1069
												S010:964
												S026:987
												S028:969
												M002:994
												M003:935
												M004:948
												M005:925
												M006:924
												M007:881
												M009:1870
												M011:981
												M020:977
												M025:992
												A012:914
												A013:894
												A017:901
												A018:1030
												A019:912
												A021:905
												A024:915
												A027:927
												A029:931
												A030:848
6	0.86	0.86	28590	1.48% Class_I/LTR/Ty3_gypsy/non-chromovirus/OTA/Tat/Retand:Ty3-GAG		1.95e-22	Other		N/A	0.000595	0.692	S014:944
				1.37% Class_I/LTR/Ty3_gypsy/non-chromovirus/OTA/Tat/Retand:Ty3-PROT								S015:1058
												S016:1068
												S022:896
												S023:990
												S001:872
												S010:933
												S026:1015
												S028:897
												M002:1002
												M003:866
												M004:958
												M005:956
												M006:951
												M007:948
												M009:1819
												M011:907
												M020:968
												M025:944
												A012:978
												A013:1020
												A017:981
												A018:910
												A019:873
												A021:1031
												A024:963
												A027:950
												A029:967
												A030:925
7	0.84	0.86	28114	7.02% Class_I/LTR/Ty3_gypsy/non-chromovirus/OTA/Tat/Retand:Ty3-GAG	Lys Lys Lys Lys Lys Lys Lys Lys	1.29e-21	Other		N/A	0.000676	0.563	S014:1023
												S015:914
												S016:1022
												S022:1060
												S023:944
												S001:959
												S010:992
												S026:991
												S028:1048
												M002:988
												M003:771
												M004:927
												M005:920
												M006:892
												M007:901
												M009:1907
												M011:968
												M020:903
												M025:873
												A012:922
												A013:856
												A017:1011
												A018:834
												A019:865
												A021:942
												A024:903
												A027:942
												A029:950
												A030:886
8	0.82	0.84	27422		Asp	1.63e-08	Other		N/A	0.415	0.0618	S014:937
												S015:881
												S016:888
												S022:910
												S023:937
												S001:922
												S010:901
												S026:917
												S028:894
												M002:899
												M003:868
												M004:938
												M005:915
												M006:931
												M007:913
												M009:1822
												M011:922
												M020:903
												M025:958
												A012:909
												A013:894
												A017:889
												A018:962
												A019:877
												A021:911
												A024:953
												A027:933
												A029:909
												A030:929
9	0.81	0.81	27092	6.02% Class_I/LTR/Ty3_gypsy/non-chromovirus/OTA/Athila:Ty3-PROT		5.12e-21	Other		N/A	0.00325	0.426	S014:976
												S015:834
												S016:851
												S022:937
												S023:895
												S001:900
												S010:847
												S026:840
												S028:829
												M002:957
												M003:975
												M004:811
												M005:956
												M006:891
												M007:952
												M009:1839
												M011:914
												M020:882
												M025:957
												A012:922
												A013:765
												A017:863
												A018:995
												A019:874
												A021:938
												A024:978
												A027:946
												A029:889
												A030:879
10	0.8	3.7	26782	4.32% Class_I/LTR/Ty1_copia/Angela:Ty1-RH		1.2e-20	Other		N/A	0.000971	0.302	S014:859
				0.27% Class_I/LTR/Ty1_copia/Angela:Ty1-RT								S015:938
												S016:967
												S022:911
												S023:929
												S001:879
												S010:946
												S026:862
												S028:942
												M002:886
												M003:870
												M004:913
												M005:860
												M006:883
												M007:949
												M009:1743
												M011:802
												M020:860
												M025:877
												A012:935
												A013:828
												A017:810
												A018:836
												A019:925
												A021:896
												A024:857
												A027:938
												A029:962
												A030:919
11	0.72	0.73	24164		Asp Asp Asp Asp Asp Asp	5.12e-21	Other		N/A	0.00116	0.433	S014:813
												S015:827
												S016:852
												S022:814
												S023:796
												S001:762
												S010:754
												S026:792
												S028:784
												M002:859
												M003:856
												M004:855
												M005:780
												M006:823
												M007:808
												M009:1642
												M011:784
												M020:789
												M025:812
												A012:793
												A013:687
												A017:774
												A018:831
												A019:811
												A021:818
												A024:819
												A027:813
												A029:842
												A030:774
12	0.71	0.71	23648			1.75e-09	Other		N/A	0.295	0.584	S014:766
												S015:836
												S016:795
												S022:724
												S023:763
												S001:707
												S010:799
												S026:797
												S028:806
												M002:866
												M003:787
												M004:771
												M005:767
												M006:779
												M007:761
												M009:1519
												M011:790
												M020:810
												M025:764
												A012:800
												A013:760
												A017:910
												A018:777
												A019:773
												A021:811
												A024:788
												A027:817
												A029:790
												A030:815
13	0.71	0.71	23621			0.00475	Putative LTR elements	553	report	0.836	0.463	S014:822
												S015:810
												S016:835
												S022:776
												S023:803
												S001:872
												S010:837
												S026:805
												S028:744
												M002:769
												M003:691
												M004:783
												M005:759
												M006:724
												M007:793
												M009:1580
												M011:817
												M020:794
												M025:695
												A012:804
												A013:729
												A017:828
												A018:805
												A019:804
												A021:771
												A024:857
												A027:794
												A029:755
												A030:765
14	0.7	0.7	23245			1.13e-18	Other		N/A	0.0352	0.171	S014:773
												S015:763
												S016:757
												S022:738
												S023:749
												S001:773
												S010:778
												S026:750
												S028:768
												M002:770
												M003:807
												M004:770
												M005:787
												M006:772
												M007:784
												M009:1504
												M011:748
												M020:783
												M025:822
												A012:829
												A013:741
												A017:817
												A018:823
												A019:789
												A021:741
												A024:771
												A027:793
												A029:787
												A030:758
15	0.67	0.68	22371		Arg Arg Arg Arg Arg Arg Arg Arg Arg Arg	7.64e-22	Other		N/A	0.000402	0.6	S014:751
												S015:863
												S016:800
												S022:752
												S023:792
												S001:691
												S010:735
												S026:804
												S028:820
												M002:692
												M003:642
												M004:775
												M005:725
												M006:645
												M007:739
												M009:1592
												M011:690
												M020:693
												M025:606
												A012:757
												A013:790
												A017:757
												A018:682
												A019:736
												A021:710
												A024:789
												A027:695
												A029:827
												A030:821
16	0.67	0.67	22356	31.63% Class_I/LTR/Ty3_gypsy/non-chromovirus/OTA/Tat/Retand:Ty3-INT		3.61e-18	Other		N/A	0.0726	0.676	S014:759
												S015:846
												S016:771
												S022:757
												S023:799
												S001:789
												S010:796
												S026:714
												S028:730
												M002:789
												M003:708
												M004:826
												M005:799
												M006:711
												M007:722
												M009:1532
												M011:644
												M020:700
												M025:717
												A012:730
												A013:633
												A017:762
												A018:794
												A019:647
												A021:753
												A024:721
												A027:716
												A029:700
												A030:791
17	0.66	0.66	21940	18.19% Class_I/LTR/Ty3_gypsy/non-chromovirus/OTA/Tat/Retand:Ty3-RT		1.39e-22	Other		N/A	0.000456	0.705	S014:760
				16.00% Class_I/LTR/Ty3_gypsy/non-chromovirus/OTA/Tat/Retand:Ty3-RH								S015:752
				13.78% Class_I/LTR/Ty3_gypsy/non-chromovirus/OTA/Tat/Retand:Ty3-aRH								S016:725
				12.22% Class_I/LTR/Ty3_gypsy/non-chromovirus/OTA/Tat/Retand:Ty3-PROT								S022:754
				0.40% Class_I/LTR/Ty3_gypsy/non-chromovirus/OTA/Tat/Ogre:Ty3-RT								S023:774
												S001:782
												S010:688
												S026:775
												S028:700
												M002:769
												M003:767
												M004:707
												M005:788
												M006:695
												M007:672
												M009:1439
												M011:654
												M020:681
												M025:724
												A012:784
												A013:729
												A017:750
												A018:732
												A019:688
												A021:728
												A024:733
												A027:755
												A029:700
												A030:735
18	0.63	0.64	21120			1.18e-20	Other		N/A	0.00758	0.333	S014:778
												S015:708
												S016:646
												S022:692
												S023:689
												S001:687
												S010:700
												S026:681
												S028:757
												M002:751
												M003:780
												M004:661
												M005:735
												M006:706
												M007:652
												M009:1481
												M011:648
												M020:729
												M025:709
												A012:765
												A013:610
												A017:678
												A018:694
												A019:682
												A021:652
												A024:706
												A027:755
												A029:708
												A030:680
19	0.62	0.62	20747			8.01e-19	Other		N/A	0.0679	0.777	S014:730
												S015:833
												S016:814
												S022:726
												S023:795
												S001:692
												S010:783
												S026:803
												S028:734
												M002:742
												M003:541
												M004:712
												M005:626
												M006:522
												M007:598
												M009:1356
												M011:706
												M020:615
												M025:518
												A012:754
												A013:716
												A017:671
												A018:621
												A019:723
												A021:643
												A024:672
												A027:687
												A029:732
												A030:682
20	0.62	0.62	20700			2.36e-19	Other		N/A	0.0195	0.4	S014:705
												S015:667
												S016:661
												S022:643
												S023:700
												S001:661
												S010:652
												S026:693
												S028:678
												M002:691
												M003:760
												M004:664
												M005:691
												M006:732
												M007:693
												M009:1368
												M011:689
												M020:721
												M025:730
												A012:691
												A013:673
												A017:697
												A018:762
												A019:664
												A021:680
												A024:697
												A027:733
												A029:673
												A030:631
21	0.62	0.62	20676	14.12% Class_I/LTR/Ty3_gypsy/non-chromovirus/OTA/Tat/Retand:Ty3-RT		5.69e-23	Other		N/A	0.00058	0.764	S014:764
				11.16% Class_I/LTR/Ty3_gypsy/non-chromovirus/OTA/Tat/Retand:Ty3-RH								S015:786
				9.69% Class_I/LTR/Ty3_gypsy/non-chromovirus/OTA/Tat/Retand:Ty3-GAG								S016:729
				9.63% Class_I/LTR/Ty3_gypsy/non-chromovirus/OTA/Tat/Retand:Ty3-aRH								S022:727
				8.27% Class_I/LTR/Ty3_gypsy/non-chromovirus/OTA/Tat/Retand:Ty3-PROT								S023:694
				0.82% Class_I/LTR/Ty3_gypsy/chromovirus/Tekay:Ty3-RH								S001:710
												S010:748
												S026:763
												S028:687
												M002:707
												M003:659
												M004:723
												M005:699
												M006:613
												M007:646
												M009:1380
												M011:756
												M020:643
												M025:586
												A012:698
												A013:596
												A017:691
												A018:648
												A019:709
												A021:653
												A024:702
												A027:649
												A029:684
												A030:626
22	0.61	0.61	20262	24.40% Class_I/LTR/Ty3_gypsy/non-chromovirus/OTA/Athila:Ty3-RT		1.08e-18	Other		N/A	0.0562	0.685	S014:773
				14.21% Class_I/LTR/Ty3_gypsy/non-chromovirus/OTA/Athila:Ty3-GAG								S015:648
				10.18% Class_I/LTR/Ty3_gypsy/non-chromovirus/OTA/Athila:Ty3-PROT								S016:582
				0.72% organelle/mitochondria								S022:630
				0.11% Class_I/LTR/Ty3_gypsy/non-chromovirus/OTA/Athila:Ty3-RH								S023:649
												S001:723
												S010:603
												S026:693
												S028:618
												M002:668
												M003:713
												M004:706
												M005:727
												M006:640
												M007:646
												M009:1461
												M011:604
												M020:688
												M025:692
												A012:701
												A013:623
												A017:656
												A018:665
												A019:697
												A021:718
												A024:731
												A027:676
												A029:701
												A030:630
23	0.61	0.61	20239		Asp Asp	8.36e-09	Other		N/A	0.324	0.488	S014:667
												S015:700
												S016:717
												S022:696
												S023:646
												S001:752
												S010:675
												S026:707
												S028:672
												M002:738
												M003:616
												M004:688
												M005:699
												M006:655
												M007:636
												M009:1396
												M011:593
												M020:694
												M025:643
												A012:638
												A013:655
												A017:612
												A018:672
												A019:698
												A021:700
												A024:623
												A027:709
												A029:706
												A030:636
24	0.6	0.6	20067			2.64e-23	Other		N/A	0.000648	0.803	S014:784
												S015:728
												S016:729
												S022:686
												S023:727
												S001:720
												S010:719
												S026:686
												S028:689
												M002:674
												M003:556
												M004:630
												M005:697
												M006:711
												M007:662
												M009:1291
												M011:654
												M020:640
												M025:608
												A012:677
												A013:645
												A017:620
												A018:627
												A019:587
												A021:619
												A024:648
												A027:698
												A029:689
												A030:666
25	0.6	2.7	19960	33.19% Class_I/LTR/Ty1_copia/Angela:Ty1-RT		1.65e-22	Other		N/A	0.000752	0.703	S014:746
				17.09% Class_I/LTR/Ty1_copia/Angela:Ty1-INT								S015:697
				4.27% Class_I/LTR/Ty1_copia/Angela:Ty1-PROT								S016:642
				0.89% Class_I/LTR/Ty1_copia/Angela:Ty1-RH								S022:578
				0.33% Class_I/LTR/Ty1_copia/Ikeros:Ty1-RT								S023:586
				0.10% Class_I/LTR/Ty1_copia/Ale:Ty1-RT								S001:706
												S010:754
												S026:686
												S028:700
												M002:679
												M003:696
												M004:598
												M005:667
												M006:689
												M007:641
												M009:1375
												M011:652
												M020:678
												M025:676
												A012:639
												A013:599
												A017:616
												A018:720
												A019:707
												A021:639
												A024:609
												A027:666
												A029:698
												A030:621
26	0.6	0.6	19929	5.33% Class_I/LTR/Ty3_gypsy/chromovirus/CRM:Ty3-INT		0.0425	Putative LTR elements	6823	report	0.821	0.712	S014:709
				3.23% Class_I/LTR/Ty3_gypsy/chromovirus/CRM:Ty3-RT								S015:677
				3.10% Class_I/LTR/Ty3_gypsy/chromovirus/CRM:Ty3-GAG								S016:618
				2.99% Class_I/LTR/Ty3_gypsy/chromovirus/CRM:Ty3-CHDCR								S022:674
				2.60% Class_I/LTR/Ty3_gypsy/chromovirus/CRM:Ty3-RH								S023:694
				1.56% Class_I/LTR/Ty3_gypsy/chromovirus/CRM:Ty3-PROT								S001:691
												S010:704
												S026:712
												S028:636
												M002:631
												M003:648
												M004:657
												M005:697
												M006:632
												M007:661
												M009:1431
												M011:701
												M020:624
												M025:645
												A012:642
												A013:628
												A017:643
												A018:702
												A019:667
												A021:635
												A024:659
												A027:674
												A029:599
												A030:638
27	0.59	0.6	19804	7.80% Class_I/LTR/Ty3_gypsy/non-chromovirus/OTA/Athila:Ty3-PROT		1.95e-22	Other		N/A	0.00111	0.685	S014:644
												S015:640
												S016:593
												S022:651
												S023:740
												S001:740
												S010:658
												S026:623
												S028:615
												M002:671
												M003:703
												M004:715
												M005:679
												M006:562
												M007:651
												M009:1352
												M011:666
												M020:641
												M025:667
												A012:588
												A013:621
												A017:701
												A018:683
												A019:718
												A021:606
												A024:655
												A027:695
												A029:686
												A030:640
28	0.59	0.59	19678	26.90% Class_II/Subclass_1/TIR/EnSpm_CACTA:CACTA-TPase		9.74e-22	Other		N/A	0.00773	0.73	S014:606
												S015:689
												S016:625
												S022:688
												S023:671
												S001:674
												S010:599
												S026:669
												S028:671
												M002:701
												M003:617
												M004:651
												M005:693
												M006:635
												M007:681
												M009:1344
												M011:635
												M020:583
												M025:638
												A012:654
												A013:542
												A017:655
												A018:674
												A019:729
												A021:619
												A024:672
												A027:689
												A029:718
												A030:656
29	0.58	0.59	19445		Ile Thr	1.79e-09	Other		N/A	0.323	0.719	S014:613
												S015:736
												S016:683
												S022:600
												S023:674
												S001:683
												S010:629
												S026:641
												S028:612
												M002:650
												M003:568
												M004:651
												M005:646
												M006:697
												M007:680
												M009:1264
												M011:652
												M020:604
												M025:663
												A012:636
												A013:638
												A017:731
												A018:686
												A019:617
												A021:580
												A024:646
												A027:690
												A029:669
												A030:606
30	0.58	0.59	19382		Ile Ile Ile Ile Ile Ile Thr Thr Thr Thr Thr Thr	1.05e-20	Other		N/A	0.0146	0.243	S014:635
												S015:710
												S016:642
												S022:635
												S023:694
												S001:620
												S010:665
												S026:671
												S028:613
												M002:703
												M003:649
												M004:707
												M005:634
												M006:637
												M007:623
												M009:1284
												M011:576
												M020:615
												M025:586
												A012:659
												A013:654
												A017:644
												A018:601
												A019:630
												A021:663
												A024:710
												A027:610
												A029:693
												A030:619
31	0.57	0.58	19145	12.48% Class_II/Subclass_1/TIR/EnSpm_CACTA:CACTA-TPase		4.53e-17	Other		N/A	0.117	0.821	S014:647
												S015:631
												S016:575
												S022:655
												S023:618
												S001:669
												S010:608
												S026:562
												S028:664
												M002:625
												M003:618
												M004:559
												M005:665
												M006:663
												M007:644
												M009:1382
												M011:609
												M020:625
												M025:599
												A012:663
												A013:622
												A017:644
												A018:669
												A019:610
												A021:640
												A024:693
												A027:618
												A029:660
												A030:708
32	0.57	0.57	19052	5.13% organelle/plastid		7.64e-22	Other		N/A	0.000262	0.596	S014:640
												S015:662
												S016:687
												S022:632
												S023:697
												S001:607
												S010:658
												S026:649
												S028:684
												M002:649
												M003:534
												M004:687
												M005:614
												M006:613
												M007:677
												M009:1173
												M011:646
												M020:635
												M025:535
												A012:625
												A013:657
												A017:645
												A018:578
												A019:635
												A021:629
												A024:661
												A027:632
												A029:704
												A030:607
33	0.57	0.57	18890		Lys Lys	5.51e-13	Other		N/A	0.202	0.62	S014:646
												S015:689
												S016:708
												S022:698
												S023:705
												S001:642
												S010:627
												S026:743
												S028:705
												M002:625
												M003:487
												M004:641
												M005:580
												M006:550
												M007:543
												M009:1262
												M011:589
												M020:599
												M025:463
												A012:650
												A013:699
												A017:651
												A018:617
												A019:627
												A021:647
												A024:607
												A027:571
												A029:662
												A030:657
34	0.57	0.57	18855			0.457	Putative satellites (low confidence)	487	report	0.957	0.808	S014:631
												S015:580
												S016:545
												S022:563
												S023:603
												S001:651
												S010:542
												S026:521
												S028:594
												M002:692
												M003:649
												M004:685
												M005:649
												M006:621
												M007:640
												M009:1420
												M011:683
												M020:580
												M025:618
												A012:702
												A013:699
												A017:653
												A018:658
												A019:640
												A021:595
												A024:625
												A027:584
												A029:602
												A030:630
35	0.54	0.55	18164	4.53% Class_I/LTR/Ty3_gypsy/chromovirus/Tekay:Ty3-INT	Met Met Met Met Met Met Met Met Met Met	0.00335	Other		N/A	0.652	0.737	S014:641
				2.77% Class_I/LTR/Ty3_gypsy/chromovirus/Tekay:Ty3-RT								S015:617
				2.00% Class_I/LTR/Ty3_gypsy/chromovirus/Tekay:Ty3-RH								S016:574
				1.78% Class_I/LTR/Ty3_gypsy/chromovirus/Tekay:Ty3-GAG								S022:546
				1.06% Class_I/LTR/Ty3_gypsy/chromovirus/Tekay:Ty3-PROT								S023:606
				0.99% Class_I/LTR/Ty3_gypsy/chromovirus/Tekay:Ty3-CHD								S001:597
												S010:600
												S026:622
												S028:606
												M002:609
												M003:626
												M004:626
												M005:611
												M006:560
												M007:611
												M009:1206
												M011:609
												M020:672
												M025:569
												A012:688
												A013:524
												A017:600
												A018:592
												A019:596
												A021:548
												A024:606
												A027:621
												A029:633
												A030:648
36	0.54	0.54	18033	18.21% Class_I/LTR/Ty3_gypsy/non-chromovirus/OTA/Tat/Retand:Ty3-INT		3.9e-23	Other		N/A	0.000333	0.784	S014:617
				11.91% Class_I/LTR/Ty3_gypsy/non-chromovirus/OTA/Tat/Retand:Ty3-RT								S015:617
				9.94% Class_I/LTR/Ty3_gypsy/non-chromovirus/OTA/Tat/Retand:Ty3-RH								S016:631
				7.94% Class_I/LTR/Ty3_gypsy/non-chromovirus/OTA/Tat/Retand:Ty3-aRH								S022:611
				5.55% Class_I/LTR/Ty3_gypsy/non-chromovirus/OTA/Tat/Retand:Ty3-PROT								S023:664
				0.47% Class_I/LTR/Ty3_gypsy/non-chromovirus/OTA/Tat/Ogre:Ty3-aRH								S001:568
				0.18% Class_I/LTR/Ty3_gypsy/non-chromovirus/OTA/Tat/Ogre:Ty3-RT								S010:565
												S026:651
												S028:564
												M002:636
												M003:591
												M004:612
												M005:571
												M006:576
												M007:583
												M009:1268
												M011:582
												M020:594
												M025:525
												A012:532
												A013:546
												A017:651
												A018:648
												A019:579
												A021:615
												A024:635
												A027:655
												A029:578
												A030:568
37	0.54	0.54	18026		Met Met Met	3.55e-21	Other		N/A	0.00389	0.468	S014:706
												S015:651
												S016:617
												S022:600
												S023:658
												S001:664
												S010:618
												S026:696
												S028:588
												M002:571
												M003:562
												M004:637
												M005:609
												M006:561
												M007:589
												M009:1220
												M011:605
												M020:573
												M025:580
												A012:560
												A013:487
												A017:656
												A018:599
												A019:583
												A021:529
												A024:588
												A027:552
												A029:590
												A030:577
38	0.53	0.53	17673			1.18e-20	Other		N/A	0.0139	0.324	S014:557
												S015:608
												S016:573
												S022:631
												S023:623
												S001:561
												S010:573
												S026:618
												S028:617
												M002:596
												M003:482
												M004:654
												M005:619
												M006:523
												M007:580
												M009:1156
												M011:602
												M020:539
												M025:504
												A012:577
												A013:576
												A017:648
												A018:560
												A019:624
												A021:614
												A024:624
												A027:591
												A029:626
												A030:617
39	0.53	0.53	17541	41.40% Class_I/LTR/Ty3_gypsy/non-chromovirus/OTA/Athila:Ty3-INT		4.29e-22	Other		N/A	0.00143	0.644	S014:628
				20.25% Class_I/LTR/Ty3_gypsy/non-chromovirus/OTA/Athila:Ty3-RH								S015:556
				0.11% organelle/mitochondria								S016:555
												S022:561
												S023:611
												S001:585
												S010:552
												S026:588
												S028:542
												M002:593
												M003:560
												M004:502
												M005:541
												M006:601
												M007:590
												M009:1248
												M011:598
												M020:591
												M025:619
												A012:633
												A013:484
												A017:625
												A018:628
												A019:636
												A021:609
												A024:547
												A027:625
												A029:577
												A030:556
40	0.51	0.51	16925	4.97% Class_I/LTR/Ty3_gypsy/chromovirus/Tekay:Ty3-INT		4.98e-22	Other		N/A	0.000295	0.633	S014:597
				3.16% Class_I/LTR/Ty3_gypsy/chromovirus/Tekay:Ty3-RH								S015:657
				2.81% Class_I/LTR/Ty3_gypsy/chromovirus/Tekay:Ty3-RT								S016:636
				2.31% organelle/plastid								S022:613
				2.14% Class_I/LTR/Ty3_gypsy/chromovirus/Tekay:Ty3-GAG								S023:572
				1.55% Class_I/LTR/Ty3_gypsy/chromovirus/Tekay:Ty3-CHD								S001:506
				1.05% Class_I/LTR/Ty3_gypsy/chromovirus/Tekay:Ty3-PROT								S010:580
												S026:640
												S028:581
												M002:517
												M003:544
												M004:506
												M005:545
												M006:533
												M007:532
												M009:1103
												M011:541
												M020:537
												M025:575
												A012:521
												A013:580
												A017:549
												A018:536
												A019:597
												A021:528
												A024:546
												A027:607
												A029:571
												A030:575
41	0.5	0.5	16703			3.14e-16	Other		N/A	0.124	0.68	S014:559
												S015:598
												S016:591
												S022:573
												S023:561
												S001:520
												S010:534
												S026:573
												S028:522
												M002:574
												M003:501
												M004:563
												M005:586
												M006:574
												M007:521
												M009:1113
												M011:507
												M020:593
												M025:542
												A012:535
												A013:527
												A017:571
												A018:567
												A019:569
												A021:549
												A024:554
												A027:557
												A029:580
												A030:589
42	0.5	0.5	16670			2.48e-19	Other		N/A	0.0226	0.0908	S014:563
												S015:561
												S016:563
												S022:522
												S023:562
												S001:565
												S010:546
												S026:522
												S028:572
												M002:543
												M003:530
												M004:540
												M005:539
												M006:550
												M007:558
												M009:1150
												M011:538
												M020:565
												M025:543
												A012:588
												A013:571
												A017:503
												A018:546
												A019:603
												A021:533
												A024:549
												A027:548
												A029:605
												A030:592
43	0.49	0.5	16422	3.51% Class_I/LTR/Ty1_copia/SIRE:Ty1-GAG	Met Met Met Met	2.29e-22	Other		N/A	0.00152	0.681	S014:522
												S015:500
												S016:515
												S022:528
												S023:528
												S001:555
												S010:544
												S026:529
												S028:470
												M002:580
												M003:530
												M004:596
												M005:553
												M006:541
												M007:529
												M009:1159
												M011:522
												M020:522
												M025:537
												A012:496
												A013:526
												A017:554
												A018:583
												A019:596
												A021:593
												A024:600
												A027:596
												A029:527
												A030:591
44	0.49	0.49	16341			1.44e-23	Other		N/A	0.00275	0.825	S014:534
												S015:569
												S016:515
												S022:522
												S023:483
												S001:572
												S010:544
												S026:571
												S028:504
												M002:505
												M003:540
												M004:539
												M005:525
												M006:577
												M007:574
												M009:1078
												M011:559
												M020:545
												M025:536
												A012:529
												A013:544
												A017:545
												A018:553
												A019:574
												A021:497
												A024:595
												A027:563
												A029:575
												A030:574
45	0.49	0.49	16306	14.09% Class_I/LTR/Ty3_gypsy/non-chromovirus/OTA/Tat/Retand:Ty3-RT		1.95e-22	Other		N/A	0.000429	0.688	S014:559
				9.78% Class_I/LTR/Ty3_gypsy/non-chromovirus/OTA/Tat/Retand:Ty3-GAG								S015:560
				7.04% Class_I/LTR/Ty3_gypsy/non-chromovirus/OTA/Tat/Retand:Ty3-PROT								S016:563
				4.35% Class_I/LTR/Ty3_gypsy/non-chromovirus/OTA/Tat/Retand:Ty3-RH								S022:533
				0.36% Class_I/LTR/Ty3_gypsy/non-chromovirus/OTA/Tat/Ogre:Ty3-RT								S023:583
												S001:498
												S010:534
												S026:620
												S028:506
												M002:539
												M003:470
												M004:581
												M005:549
												M006:511
												M007:516
												M009:1104
												M011:565
												M020:530
												M025:469
												A012:595
												A013:597
												A017:595
												A018:526
												A019:538
												A021:513
												A024:558
												A027:469
												A029:556
												A030:569
46	0.49	0.49	16196	12.76% Class_I/LTR/Ty3_gypsy/non-chromovirus/OTA/Tat/Retand:Ty3-GAG		1.95e-21	Other		N/A	0.0079	0.666	S014:635
				8.66% Class_I/LTR/Ty3_gypsy/non-chromovirus/OTA/Tat/Retand:Ty3-PROT								S015:537
				1.44% Class_I/LTR/Ty3_gypsy/non-chromovirus/OTA/Tat/Retand:Ty3-RT								S016:559
				0.57% Class_I/LTR/Ty3_gypsy/non-chromovirus/non-chromo-outgroup:Ty3-RT								S022:581
				0.35% Class_I/LTR/Ty3_gypsy/non-chromovirus/OTA/Tat/Ogre:Ty3-RT								S023:629
				0.20% Class_I/LTR/Ty3_gypsy/non-chromovirus/OTA/Athila:Ty3-RT								S001:523
				0.19% Class_I/LTR/Ty3_gypsy/chromovirus/Tcn1:Ty3-RT								S010:534
												S026:583
												S028:528
												M002:465
												M003:497
												M004:578
												M005:513
												M006:520
												M007:505
												M009:1172
												M011:571
												M020:506
												M025:490
												A012:563
												A013:472
												A017:536
												A018:484
												A019:524
												A021:550
												A024:525
												A027:497
												A029:588
												A030:531
47	0.48	0.49	16094			1.09e-16	Other		N/A	0.0864	0.595	S014:602
												S015:512
												S016:566
												S022:480
												S023:517
												S001:541
												S010:498
												S026:567
												S028:583
												M002:508
												M003:563
												M004:564
												M005:490
												M006:514
												M007:532
												M009:1095
												M011:530
												M020:532
												M025:578
												A012:514
												A013:512
												A017:512
												A018:498
												A019:533
												A021:513
												A024:589
												A027:537
												A029:562
												A030:552
48	0.48	0.48	16028	1.35% Class_I/LTR/Ty1_copia/TAR:Ty1-GAG		1.48e-20	Other		N/A	0.0151	0.704	S014:544
				1.30% Class_I/LTR/Ty1_copia/TAR:Ty1-PROT								S015:543
												S016:525
												S022:536
												S023:567
												S001:543
												S010:494
												S026:537
												S028:549
												M002:477
												M003:537
												M004:537
												M005:505
												M006:523
												M007:536
												M009:1105
												M011:592
												M020:569
												M025:554
												A012:577
												A013:510
												A017:539
												A018:518
												A019:553
												A021:468
												A024:545
												A027:512
												A029:521
												A030:512
49	0.48	0.48	15949			1.18e-18	Other		N/A	0.0381	0.336	S014:519
												S015:577
												S016:495
												S022:583
												S023:521
												S001:536
												S010:538
												S026:500
												S028:535
												M002:535
												M003:550
												M004:509
												M005:548
												M006:460
												M007:554
												M009:1040
												M011:553
												M020:554
												M025:531
												A012:528
												A013:560
												A017:532
												A018:521
												A019:506
												A021:554
												A024:525
												A027:558
												A029:554
												A030:473
50	0.48	0.48	15871	0.18% 5S_rDNA/5S_rDNA		6.43e-17	Other		N/A	0.0931	0.633	S014:535
												S015:580
												S016:502
												S022:544
												S023:494
												S001:535
												S010:513
												S026:498
												S028:482
												M002:574
												M003:504
												M004:525
												M005:528
												M006:525
												M007:527
												M009:1041
												M011:520
												M020:488
												M025:547
												A012:533
												A013:479
												A017:553
												A018:556
												A019:526
												A021:513
												A024:598
												A027:540
												A029:541
												A030:570
51	0.47	0.48	15830			5.65e-16	Other		N/A	0.0861	0.306	S014:541
												S015:586
												S016:462
												S022:537
												S023:495
												S001:534
												S010:491
												S026:476
												S028:520
												M002:555
												M003:522
												M004:510
												M005:470
												M006:590
												M007:560
												M009:1009
												M011:535
												M020:562
												M025:586
												A012:504
												A013:495
												A017:537
												A018:530
												A019:524
												A021:545
												A024:541
												A027:582
												A029:537
												A030:494
52	0.47	0.48	15816	17.85% Class_I/LTR/Ty3_gypsy/chromovirus/Tekay:Ty3-RT		5.69e-23	Other		N/A	0.0019	0.762	S014:587
				15.15% Class_I/LTR/Ty3_gypsy/chromovirus/Tekay:Ty3-RH								S015:582
				13.03% Class_I/LTR/Ty3_gypsy/chromovirus/Tekay:Ty3-GAG								S016:542
				8.36% Class_I/LTR/Ty3_gypsy/chromovirus/Tekay:Ty3-PROT								S022:527
												S023:574
												S001:524
												S010:559
												S026:576
												S028:519
												M002:568
												M003:458
												M004:473
												M005:519
												M006:530
												M007:550
												M009:1049
												M011:515
												M020:461
												M025:482
												A012:510
												A013:524
												A017:512
												A018:535
												A019:505
												A021:563
												A024:521
												A027:527
												A029:530
												A030:494
53	0.47	0.47	15608			1.91e-19	Other		N/A	0.0179	0.443	S014:530
												S015:514
												S016:492
												S022:561
												S023:505
												S001:546
												S010:556
												S026:531
												S028:520
												M002:509
												M003:495
												M004:504
												M005:540
												M006:494
												M007:531
												M009:1073
												M011:548
												M020:506
												M025:498
												A012:531
												A013:467
												A017:541
												A018:521
												A019:490
												A021:554
												A024:473
												A027:500
												A029:583
												A030:495
54	0.47	1.1	15604			1.59e-20	Other		N/A	0.00179	0.204	S014:535
												S015:524
												S016:526
												S022:534
												S023:524
												S001:550
												S010:533
												S026:554
												S028:541
												M002:506
												M003:472
												M004:485
												M005:474
												M006:534
												M007:529
												M009:1005
												M011:482
												M020:530
												M025:505
												A012:511
												A013:506
												A017:518
												A018:487
												A019:523
												A021:589
												A024:508
												A027:542
												A029:548
												A030:529
55	0.47	0.47	15550			1.39e-16	Other		N/A	0.105	0.684	S014:617
												S015:551
												S016:464
												S022:467
												S023:522
												S001:516
												S010:554
												S026:482
												S028:519
												M002:509
												M003:510
												M004:523
												M005:484
												M006:557
												M007:553
												M009:984
												M011:500
												M020:568
												M025:577
												A012:473
												A013:490
												A017:524
												A018:494
												A019:516
												A021:525
												A024:534
												A027:491
												A029:538
												A030:508
56	0.47	0.47	15527		Met	4.98e-22	Other		N/A	0.00142	0.627	S014:567
												S015:519
												S016:541
												S022:482
												S023:471
												S001:547
												S010:521
												S026:526
												S028:540
												M002:469
												M003:511
												M004:495
												M005:488
												M006:487
												M007:529
												M009:1001
												M011:508
												M020:479
												M025:529
												A012:494
												A013:504
												A017:576
												A018:475
												A019:529
												A021:595
												A024:493
												A027:556
												A029:576
												A030:519
57	0.46	0.46	15404			0.819	Putative satellites (high confidence)	343	report	0.97	0.929	S014:444
												S015:430
												S016:412
												S022:507
												S023:406
												S001:431
												S010:384
												S026:396
												S028:559
												M002:542
												M003:411
												M004:567
												M005:478
												M006:497
												M007:493
												M009:1071
												M011:388
												M020:561
												M025:533
												A012:576
												A013:724
												A017:684
												A018:667
												A019:487
												A021:518
												A024:579
												A027:543
												A029:602
												A030:514
58	0.46	0.46	15403	18.84% Class_I/LTR/Ty3_gypsy/chromovirus/Tekay:Ty3-INT		1.29e-21	Other		N/A	0.00338	0.557	S014:550
				7.67% Class_I/LTR/Ty3_gypsy/chromovirus/Tekay:Ty3-RT								S015:571
				7.43% Class_I/LTR/Ty3_gypsy/chromovirus/Tekay:Ty3-RH								S016:589
				4.62% Class_I/LTR/Ty3_gypsy/chromovirus/Tekay:Ty3-CHD								S022:546
				1.03% Class_I/LTR/Ty3_gypsy/chromovirus/Tekay:Ty3-PROT								S023:546
				0.68% Class_I/LTR/Ty3_gypsy/chromovirus/Tcn1:Ty3-RT								S001:508
				0.35% Class_I/LTR/Ty3_gypsy/chromovirus/Chlamyvir:Ty3-RT								S010:602
				0.21% Class_I/LTR/Ty3_gypsy/chromovirus/Reina:Ty3-RT								S026:527
				0.14% Class_I/LTR/Ty3_gypsy/non-chromovirus/OTA/Athila:Ty3-RH								S028:604
												M002:537
												M003:492
												M004:511
												M005:541
												M006:482
												M007:482
												M009:953
												M011:472
												M020:474
												M025:469
												A012:488
												A013:437
												A017:496
												A018:581
												A019:512
												A021:455
												A024:501
												A027:537
												A029:523
												A030:417
59	0.46	0.46	15310			1.29e-21	Other		N/A	0.00287	0.557	S014:526
												S015:449
												S016:476
												S022:518
												S023:475
												S001:500
												S010:465
												S026:485
												S028:552
												M002:487
												M003:537
												M004:520
												M005:530
												M006:505
												M007:466
												M009:1057
												M011:541
												M020:528
												M025:581
												A012:506
												A013:488
												A017:499
												A018:490
												A019:511
												A021:526
												A024:544
												A027:504
												A029:528
												A030:516
60	0.45	0.45	14940	20.84% Class_I/LTR/Ty3_gypsy/non-chromovirus/OTA/Tat/Retand:Ty3-INT		4.98e-22	Other		N/A	0.000669	0.635	S014:507
				7.76% Class_I/LTR/Ty3_gypsy/non-chromovirus/OTA/Tat/Retand:Ty3-aRH								S015:582
				6.19% Class_I/LTR/Ty3_gypsy/non-chromovirus/OTA/Tat/Retand:Ty3-RH								S016:518
												S022:504
												S023:585
												S001:470
												S010:534
												S026:515
												S028:505
												M002:486
												M003:415
												M004:509
												M005:519
												M006:416
												M007:470
												M009:1033
												M011:533
												M020:444
												M025:456
												A012:533
												A013:476
												A017:525
												A018:387
												A019:499
												A021:538
												A024:485
												A027:494
												A029:521
												A030:481
61	0.45	0.45	14900			2.34e-21	Other		N/A	0.00174	0.511	S014:496
												S015:524
												S016:471
												S022:532
												S023:437
												S001:577
												S010:481
												S026:443
												S028:474
												M002:467
												M003:488
												M004:479
												M005:519
												M006:575
												M007:471
												M009:1055
												M011:452
												M020:488
												M025:526
												A012:523
												A013:447
												A017:482
												A018:540
												A019:495
												A021:490
												A024:495
												A027:475
												A029:507
												A030:491
62	0.45	0.45	14866			1.36e-19	Other		N/A	0.043	0.662	S014:638
												S015:619
												S016:562
												S022:570
												S023:578
												S001:551
												S010:575
												S026:640
												S028:549
												M002:444
												M003:400
												M004:442
												M005:447
												M006:407
												M007:485
												M009:949
												M011:475
												M020:455
												M025:431
												A012:459
												A013:473
												A017:493
												A018:446
												A019:464
												A021:483
												A024:479
												A027:429
												A029:464
												A030:459
63	0.43	2.2	14439	21.96% Class_I/LTR/Ty1_copia/Angela:Ty1-GAG		1.26e-12	Other		N/A	0.214	0.621	S014:487
				2.33% Class_I/LTR/Ty1_copia/Angela:Ty1-PROT								S015:508
												S016:447
												S022:440
												S023:488
												S001:517
												S010:514
												S026:457
												S028:459
												M002:505
												M003:514
												M004:474
												M005:538
												M006:512
												M007:513
												M009:960
												M011:467
												M020:504
												M025:459
												A012:434
												A013:452
												A017:448
												A018:480
												A019:514
												A021:476
												A024:468
												A027:487
												A029:461
												A030:456
64	0.43	0.43	14204			1.32e-06	Other		N/A	0.451	0.808	S014:531
												S015:441
												S016:491
												S022:459
												S023:447
												S001:491
												S010:463
												S026:427
												S028:503
												M002:499
												M003:498
												M004:446
												M005:429
												M006:534
												M007:457
												M009:937
												M011:428
												M020:493
												M025:442
												A012:506
												A013:431
												A017:478
												A018:445
												A019:470
												A021:504
												A024:515
												A027:455
												A029:541
												A030:443
65	0.43	0.43	14198	12.52% Class_I/LTR/Ty3_gypsy/chromovirus/Tekay:Ty3-INT		2.09e-21	Other		N/A	0.000916	0.516	S014:437
				7.43% Class_I/LTR/Ty3_gypsy/chromovirus/Tekay:Ty3-RT								S015:490
				6.35% Class_I/LTR/Ty3_gypsy/chromovirus/Tekay:Ty3-RH								S016:451
				4.63% Class_I/LTR/Ty3_gypsy/chromovirus/Tekay:Ty3-GAG								S022:466
				3.33% Class_I/LTR/Ty3_gypsy/chromovirus/Tekay:Ty3-CHD								S023:506
				3.01% Class_I/LTR/Ty3_gypsy/chromovirus/Tekay:Ty3-PROT								S001:484
												S010:460
												S026:531
												S028:488
												M002:482
												M003:439
												M004:514
												M005:456
												M006:520
												M007:458
												M009:986
												M011:429
												M020:450
												M025:443
												A012:454
												A013:425
												A017:506
												A018:498
												A019:463
												A021:449
												A024:438
												A027:475
												A029:502
												A030:498
66	0.43	0.43	14188	17.42% Class_I/LTR/Ty3_gypsy/chromovirus/CRM:Ty3-INT		4.71e-23	Other		N/A	0.000493	0.774	S014:500
				11.31% Class_I/LTR/Ty3_gypsy/chromovirus/CRM:Ty3-RT								S015:371
				9.22% Class_I/LTR/Ty3_gypsy/chromovirus/CRM:Ty3-GAG								S016:401
				8.99% Class_I/LTR/Ty3_gypsy/chromovirus/CRM:Ty3-RH								S022:371
				4.86% Class_I/LTR/Ty3_gypsy/chromovirus/CRM:Ty3-PROT								S023:423
												S001:458
												S010:425
												S026:478
												S028:434
												M002:466
												M003:470
												M004:465
												M005:492
												M006:429
												M007:481
												M009:919
												M011:456
												M020:452
												M025:437
												A012:514
												A013:549
												A017:551
												A018:540
												A019:486
												A021:456
												A024:497
												A027:586
												A029:517
												A030:564
67	0.42	0.42	14001	37.52% Class_I/LTR/Ty3_gypsy/chromovirus/Tekay:Ty3-INT		2.34e-21	Other		N/A	0.00129	0.508	S014:466
				9.48% Class_I/LTR/Ty3_gypsy/chromovirus/Tekay:Ty3-CHD								S015:455
												S016:511
												S022:491
												S023:563
												S001:504
												S010:444
												S026:492
												S028:503
												M002:460
												M003:412
												M004:502
												M005:422
												M006:448
												M007:412
												M009:977
												M011:437
												M020:460
												M025:448
												A012:443
												A013:457
												A017:447
												A018:440
												A019:400
												A021:480
												A024:470
												A027:426
												A029:571
												A030:460
68	0.42	0.42	14000	0.20% Class_I/LTR/Ty3_gypsy/non-chromovirus/OTA/Tat/Retand:Ty3-INT		9.72e-21	Other		N/A	0.00743	0.443	S014:486
												S015:457
												S016:489
												S022:384
												S023:506
												S001:455
												S010:467
												S026:453
												S028:524
												M002:437
												M003:388
												M004:486
												M005:444
												M006:462
												M007:449
												M009:989
												M011:541
												M020:450
												M025:442
												A012:449
												A013:453
												A017:513
												A018:503
												A019:425
												A021:511
												A024:448
												A027:463
												A029:454
												A030:472
69	0.42	0.42	13888	0.14% organelle/plastid		5.33e-21	Other		N/A	0.0164	0.772	S014:456
												S015:445
												S016:407
												S022:468
												S023:410
												S001:471
												S010:445
												S026:482
												S028:457
												M002:470
												M003:467
												M004:468
												M005:426
												M006:474
												M007:447
												M009:1037
												M011:450
												M020:497
												M025:477
												A012:449
												A013:446
												A017:454
												A018:453
												A019:455
												A021:436
												A024:471
[truncated: 5,252 more rows]

## Sheet: Table S5
Table S6. Read counts of the genotype and species specific repetitive sequences identified among Ae. tauschii accessions.													subspecies	genotype	CL1	CL62	CL87	CL119	CL142	CL213	CL217	rDNA	CL220
subspecies	genotype	CL1	CL62	CL87	CL119	CL142	CL213	CL217	rDNA	CL220			strangulata	S014	914	638	459	196	153	15	5	2336	45
strangulata	S014	914	638	459	196	153	15	5	2336	45			strangulata	S015	1103	619	434	133	115	19	4	3842	0
strangulata	S015	1103	619	434	133	115	19	4	3842	0			strangulata	S016	863	562	464	157	100	22	9	11523	0
strangulata	S016	863	562	464	157	100	22	9	11523	0			strangulata	S022	1050	570	442	185	113	24	2	5254	67
strangulata	S022	1050	570	442	185	113	24	2	5254	67			strangulata	S023	859	578	430	160	126	28	5	5806	0
strangulata	S023	859	578	430	160	126	28	5	5806	0			strangulata	S001	937	551	429	226	124	11	8	4161	0
strangulata	S001	937	551	429	226	124	11	8	4161	0			strangulata	S010	1027	575	467	188	139	26	1	5686	0
strangulata	S010	1027	575	467	188	139	26	1	5686	0			strangulata	S026	1124	640	413	206	152	18	3	4455	0
strangulata	S026	1124	640	413	206	152	18	3	4455	0			strangulata	S028	1064	549	462	232	122	32	5	4670	65
strangulata	S028	1064	549	462	232	122	32	5	4670	65			meyeri	M002	1587	444	383	396	192	33	5	3060	30
meyeri	M002	1587	444	383	396	192	33	5	3060	30			meyeri	M003	1534	400	338	354	253	29	39	4110	0
meyeri	M003	1534	400	338	354	253	29	39	4110	0			meyeri	M004	1327	442	355	281	219	33	8	8885	0
meyeri	M004	1327	442	355	281	219	33	8	8885	0			meyeri	M005	1563	447	362	376	294	11	31	4161	0
meyeri	M005	1563	447	362	376	294	11	31	4161	0			meyeri	M006	1387	407	335	312	238	37	47	3685	0
meyeri	M006	1387	407	335	312	238	37	47	3685	0			meyeri	M007	1419	485	346	358	240	32	37	3306	0
meyeri	M007	1419	485	346	358	240	32	37	3306	0			meyeri	M008	1456	442	370	297	242	58	43	3804	50
meyeri	M008	1456	442	370	297	242	58	43	3804	50			meyeri	M011	1359	475	345	285	232	74	39	4242	37
meyeri	M011	1359	475	345	285	232	74	39	4242	37			meyeri	M020	1518	455	385	348	249	60	41	4000	0
meyeri	M020	1518	455	385	348	249	60	41	4000	0			meyeri	M025	1434	431	382	288	236	29	53	2427	0
meyeri	M025	1434	431	382	288	236	29	53	2427	0			anathera	A012	1517	459	331	309	293	46	10	3708	32
anathera	A012	1517	459	331	309	293	46	10	3708	32			anathera	A013	2080	473	350	378	253	48	30	6115	332
anathera	A013	2080	473	350	378	253	48	30	6115	332			anathera	A017	1732	493	409	349	228	33	8	3833	0
anathera	A017	1732	493	409	349	228	33	8	3833	0			anathera	A018	1756	446	329	334	294	43	9	1417	0
anathera	A018	1756	446	329	334	294	43	9	1417	0			anathera	A019	1389	464	340	256	257	35	122	3934	55
anathera	A019	1389	464	340	256	257	35	122	3934	55			anathera	A021	1422	483	334	274	261	80	42	2852	0
anathera	A021	1422	483	334	274	261	80	42	2852	0			anathera	A024	1274	479	385	292	255	36	13	2058	55
anathera	A024	1274	479	385	292	255	36	13	2058	55			anathera	A027	1572	429	364	339	270	37	94	3076	0
anathera	A027	1572	429	364	339	270	37	94	3076	0			anathera	A029	1444	464	362	297	250	66	60	2748	42
anathera	A029	1444	464	362	297	250	66	60	2748	42			anathera	A030	1504	459	350	321	252	39	73	7738	0
anathera	A030	1504	459	350	321	252	39	73	7738	0

## Sheet: Table S6
Table S7. Analysis of variance results for the abundances of species specific repeats.
cluster	subspecies		mean	StDev	95% CI	ANOVA P-value
	anathera	10	1569	232.4	(1467.0, 1671.0)	0
CL1 (satellite)	meyeri	10	1458.4	88.9	(1356.4, 1560.4)
	strangulata	9	993.4	101.8	(885.9, 1101.0)
	anathera	10	464.9	18.56	(447.03, 482.77)	0
CL62 (Ty3_gypsy)	meyeri	10	442.8	26.33	(424.93, 460.67)
	strangulata	9	586.9	35.9	(568.1, 605.7)
	anathera	10	355.4	25.63	(341.34, 369.46)	0
CL87 (Ty3_gypsy)	meyeri	10	360.1	19.14	(346.04, 374.16)
	strangulata	9	444.44	19.24	(429.62, 459.27)
	anathera	10	314.9	36.7	(290.6, 339.2)	0
CL119 (satellite)	meyeri	10	329.5	41.8	(305.2, 353.8)
	strangulata	9	187	32.7	(161.3, 212.7)
	anathera	10	261.3	20	(247.25, 275.35)	0
CL142 (Ty1_copia)	meyeri	10	239.5	25.81	(225.45, 253.55)
	strangulata	9	127.11	17.85	(112.30, 141.92)
	anathera	10	46.3	15.23	(36.79, 55.81)	0.003
CL213 (satellite, 5S rDNA)	meyeri	10	39.6	18.66	(30.09, 49.11)
	strangulata	9	21.67	6.61	(11.64, 31.70)
	anathera	10	46.1	40.1	(29.6, 62.6)	0.005
CL217 (satellite, Ty3_gypsy)	meyeri	10	34.3	15.79	(17.79, 50.81)
	strangulata	9	4.667	2.598	(-12.736, 22.070)
	anathera	10	3748	1889	(2397, 5098)	0.264
45S rDNA	meyeri	10	4168	1753	(2818, 5518)
	strangulata	9	5304	2561	(3880, 6727)

## Sheet: Table S7
Table S5. Satellites identified from Ae. tauschii genotypes by comparative analysis of repetitive sequences using RepeatExplorer2
	Cluster	Proportion[%]	Number of reads	Satellite probability	Consensus length	Consensus	CG content (%)	Identified homolog repeat by blastn
High confidence
1	1	1.2	40715	0.937	337	GATTTCATTTTTTAAAACTTATTTGAACTCCTGACTTTTTGTGTGTTCAAAATGCACCATTCAAAGCCACATCATCATTTTTCAATCCTTTCTGACTTCATTTGTTATTTTTCATGCATTTACTAATTATTTTGAGCTATAAGACCCTAAAATTGAAAAGCATTTCAAATGAACTCTGAAAAGGTTGAAAGTTGGCATGGTATCATCATTTCATCCACATAGCATGTGCAAGAAAGTTGAGAGGGTTACGGCAAAAACTGGATGCACTTCGTGTACAAAACGGACAATCTCTTTCAAAGTATCAGGATTTCATCCGGAAACTCGTCTGTTACAAAGG	34.4	pTa-173; pAs1 (Komuro et al. 2013); Afa family (Nagaki et al. 1995)
57	57	0.46	15404	0.819	343	GTGTTGGAAATTGATGACGTCGCTTTGAATGATGCATACTGAACGCAAAAATAGGCTGGAGTTCAAATAAGTTTAAAAAACATTGAAGTGCCCGTGTAACAGATGAGTTCTCGTCCGAAACCCTGATACTCCGAAAGAGATTGTCCAGTTTGTACACGAGGTGCGTCCAGTTTTCGCCGTGACCCTCTCTACTCTTTTGCACATGCTATGCGGGTGAAATGATGATACCATGCCAAGTTCCAACATTTTCAGAGTTCATTTTGTAGTGATTTTCAATTTCACCGTCATTTAGCTCTCTAAACAAATCGGTAAATGACTGAAAAACAGCAAATGATGTCAGAAC	40.8	pTa-s53 (Komuro et al. 3013), pTa-535 (Komuro et al. 3013); pAs1 related. Homologous to CL49 from bread wheat.
119	119	0.25	8474	0.926	369	CATTCTACTTCACTAAACATCTCCATATGAGATCCAATTACTTGTAGGGAAATGCAAGAGACCTCAGTTATGATGATGCACTAGGTCCATAGCTGGGACTTTGTGTATGTTCTCGAAATGCGTTTGTCGAGTGCTCATTAAGAAAGTTTCTATACAAGTTTCTGAACGAACTCCTTAAGAAAAGTTCTCCAAAAGTTCCCTATGAAAGAATCCTTTGAAGCATCTGGTCGTCACAAACGTTTTGACTACTTGTGGAGCCAAAACGGACTCCGTATGAGTCAGATATCCATGTTTCAGTTAACACTGCGCAAAACTGATTCCGAACGACAGTTACAGACTAGTTCTTGTGTAGTTGCATTCGATTTTTTC	39.8	4P6-2 (Zhang et al. 2004): BAC-FISH in wheat identifies chromosome landmarks consisting of different types of transposable elements; Identical to the corresponding monomer from bread wheat.
176	176	0.11	3543	0.932	44	GTTGAACTAGCTCTATAAGCTAGTACAAATAATTTTACACTAGA	29.5
214	214	0.03	995	0.981	733	CGAATAAAAAATCATCGGCAACAGATCAAAAGTTTATGTAAAGGTGCTAAACATGAATAATTTATGTGGATAAGCTGTTCTATGACTTCCACATGGCCGTCGAGACCACTCTCGAAGAATGAAATGATGGAAAGGCAATTATAATGTGTCTAATGTCCTATTTAAATGATTTCTGAGTTTCAAAGGAGGAGAAAATTCAAAGTAATAAATCAAAAGGTTATGAAAAACTGCTAAAAATTATGTGACTCCTACATATATAAGTTGTTGTAGGATTTTCAAATGGCGGCAAAGACAACTTCGAAACAAGAAACGAACAAAGGCTTCTATCACTTGTTGATAATGCAATTTAAACAAGTTTTCAGTTTCGCAAAAATAGAAAATCTACCATGATGGATCAAA…	32.7
220	220	0.025	850	0.894	180	AACAAGGTTAGAAATCTAAGGCTAATACTCATTTAAAATGGGGCTCGTCGAGTCAGGACCAATTTGTCCGAAAATCCAAGGCTAACACCCCCTCCAAAAACCAAGTTCTATCATTTTGGGGGGAAAAGTCTATTACCCATAAATTTGAAGTCTAATACCAACTAAAAGGGATTGGATATG	38.9
224	224	0.021	716	0.975	320	ATGAATTTCTTATGGTTTTCTCCGTGAAACGCACCGAAAACACTGACCGGGCGTGACGCAACGTGCGTTTGGTGTCCGAATTCGTTCAAATCTTGCGTGGGGCCCTAAGATGGGCATGCCCACTGCCTCCCAAAATTGGGTGACGTTTCATGCATGCCACCTCGTACCACCCATGCAACCGGCACTGATCGGATATGAAGGAGGTCAGCTCCGTACTGCGTTTTCTTTTCTGACTCAGCCGGTGGACCCCAAACTTTTTCCACACGCCAGCATCACCAGGGCCATCATGCGTGCAAGTTTTCATAATTTTCCGACACCGT	52.2
236	236	0.016	536	0.821	54	TTAGTGATATAAAATTAAGTTGGATAATCGCAATACTGAATTTTAGTACTGAAA	24.1
Low confidence
34	34	0.57	18855	0.457	487	CTCGTGTCAACATAGAACAACAGGAGTGTTGTGTGAATTTTTGTGATTTTTCGGGGTTCGTTTGGACATTTTTATGCATTAACTGAGTTTTCAATGCATTTATGTGCATAATTCAAATTTGAACTACATGCACATGCTCCAGTGCATATAAATTGGTTGAAAAATCAAATCTGTGTCCTTGGGTGCATGCTTAGGTCCCATGCAAGAAATGGGAATGAATTTCAAACACCAGGGCACCGTTGATTGCCGGCAAAACATTGAGATGCCTGGTTTTTAAATTCTAGTAAATCCAAAACTCGTCTGAAATTCATGAAACTTGGCATGCTATCATGGAGCGGCATCAACATGCCGTGGTACAAATTTTGTCCCATTTGGGGCAGGTTTGGGTATATGCTTCTC…	40.2	78% identity with pTa-451 FISH-positive (KC290912.1) (Komuro et al. 2013)
173	173	0.12	3835	0.1670	331	CACGGACGGCGCCGCCGCGGCACCTGGAGGGGGGTAACGGACGCGTCGGGTCTACACGGAGGGGATCTTGCTGTGGATTTGGCCCGGATGTTGCTCCAAAGTGTTCCTATGGGCTGACCTAACACAACCGGGTGGATAGTTCCACTGCTCAAAGCCCGTCCGTGCAAAGTCAAAGGGCTAGATCCCGTGGTCAAACGCTACAGGGTTAGGCGGGACGGGGGCCCTGGGGGGCTAGAATGCCACCGGAGCGTCGCACCGGGCCCTCATACATGCCGGGTGGTGTGGTGGCATGTCCGAAGAGGCGGCACGCGTCTCCGGGGTGTGCCCCCCT	65	Homologous to Triticum aestivum clone pTa-465 FISH-positive repetitive sequence (Komuro et al. 3013). Homologous to CL155 from durum wheat.
199	199	0.045	1486	0.0278	6371	GGCTTACTAAAACTTTCTCTTCGCTTAATGCAGATCCAGAACTTCCGGGCGCCGTTGACTGCGGAACAGATCACTCGGAGCCTGGAGGCCTACTTACTGTGGCTTTTCGGCAAGGTGATGTTCACGGAGAACCATGTCACCACTATTAGCGCCCTCTACATCCCTATGGCACTCGAGATAGCGAGCGCTCAGACGGCGGATCAGATCAGACAGAGGAGTTGGGGTTCGGCGGTCTTAGCGGCTACATACCGAGGTATGTGCAACGGTTGCCAGCTTACATCGAGAAAGCCAGCCCTTCTTGGATGCCCTCTATTCCTACAGCTGTGGTCGTGGGAGAGGTTCTCTATAGGGCGACCAGATGTACGTGTTCATGAGCCTATAGACGCCATGTTTGATGTT…	47.7
211	211	0.033	1109	0.0746	118	TCGCAGTTTTGGCCGATTCTGGCCCGTTTCGTGGACTATTACTCACTGTTTTGGGGTCCCGGAGTGATTTCCACGATTGACGAACCCCGGGGTGCGTTTACGTGTCGGTCATCAACAC	54.2	Homologous to pTa-835 (Komuro et al. 2013) and pSc119
217	217	0.026	880	0.0531	317	CAAAAAAAACCGTAGTTGGGAACCCCCCTCCGGCAGACCGAAACGGAGCTGGTTGCACAAGGTCTACGTGATCGCATGCATGCAATTGCACCAGAGTGTGCAGACATGTGGGCACGGCCGACGTAGGGCCCCACGCAAGGTTGGAACGAAAACGGACACAAAACGAACGTTGCGTCACGTCCGGCCAGTGTTTTAGGGTATTTTCACCGGGAAAATCCTAGGAAATGCATCGAGCGTCGGAAAAATATGAAAATTGGCGTGGGTGCTGTCGATGGTGATGCCAACGTGTGGAAAAAGTTGGGGGCATTTGACGGAGT	53
225	225	0.021	714	0.0384	567	TCCGAAACGGACTCCGAATGACAAAGTTATGACCGTTTTAGTGAACACCGGTCCTTTATATGGCAGTCCTTGAAAGAACTTCATTTTCTCGTGACGCGTTCTGGCGCGCCGCCCCAAAATTTTGTGTCCTCCATAGTGGAGATATTGTTTCCACATATATATTGACCGATGCCAGGAATGCCCTCCTATTATTGGCTGTCACACACGTACGTTACGGCATGCCACACGGCAAAAACAAGGAGAATAAGGCTTATAGTCGCCTTATTTTCTTGAATTTACAACCAAATGGGATTCCCCGGATCATAGAGCATGTGCAGAATGCAACGTTTGTCCTTACCAGGCGGACTAATGTTTATACTCACCATAATCTCTCGGATTTCCTTCCAAAGGAGTGCCAAT…	46.9
239	239	0.014	472	0.0439	336	ACCGAGAGAGGGGGTAGGCCACGGTCAACAACTGCTTCTTCTCATGTTCATGTCATCGCGAGATGACAGACCAAGTCTAGGCCCGTTCTGTCACGGGACCTGGAATTTAAGATCTGTCTCGGGGACGAAAGCATATGATCCTCGACGTTCCCGCCCGTGTGTGTGGTTTGTGAGGCACGTGCCACGGGAAGGACGTGCGTTGCTTATTCAAATAGCACACCACCCCTGCATGCATATGCATGGGCCACACGCATGTAGGGGTGCCCTCCCCCCCTCTGGCGGTCTCTATATCGAGCAGCCATCCGGTGGCCCCGGCGGTCTAGGGCATTATTCGGC	57.7
250	250	0.011	352	0.0594	553	TACTTCAAGCATAAAATCGTCCGGAACTCAATTTTACAAGCCGGATCTTGCCTCCGAAATGTTGTCGAAGCCCGCGAGTGGGTTACGGGCGCATACAACTTTTGGTTGTGATTGTTTTGGCGGGTCATGGAGCTCCAATGGAGTTTTTGTGGCAAAATTGTTGCCGTTTTATGGATACAACATCGCGGGACAGACCGTGAATACAACTTTCAAGGTAAGTTGATCGCACCGACGAGCCATCTTGCACAACTCGGAATGACCTATAATTTTTCGAGTGCATAAACGGAGTGAGGATGAACTGTTATGTACTTTATGATCCAAGAATAATGCATCTGCTGGTGAAAACGTGAGGGTGGTAGCGGGATGGGTGATAGACCATGTAAAGCATGAATTCTTGGG…	45.6

## Sheet: Table S8
Table S8. ITS1-5.8S-ITS2 region of 29 Ae. tauschii accessions.
>M007
GTCGTGACCCTGACCAAAACAGACCGCGCACGCGTCATCCAATCCGTCGGTGACGGCACTGTCCGTCGCTCGGCCAATGCCTCGACCACCTCCCCTCCTCGGAGCGGGTGGTGGCTCGGGGTAAAAGAACCCACGGCGCCGAAGGCGTCAAGGAACACTGTGCCTAACCCGGGGGCATGGCTAGCTTGCTAGCCGTCCCTTGTGTTGCAAAGCTATTTAATCCACACGACTCTCGGCAACGGATATCTCGGCTCTCGCATCGATGAAGAACGTAGCGAAATGCGATACCTGGTGTGAATTGCAGAATCCCGCGAACCATCGAGTCTTTGAACGCAAGTTGCGCCCGAGGCCACTCGGCCGAGGGCACGCCTGCCTGGGCGTCACGCCAAAACACGCTCC…
>A021
GTCGTGACCCTGACCAAAACAGACCGCGCACGCGTCATCCAATCCGTCGGTGACGGCACTGTCCGTCGCTCGGCCAATGCCTCGACCACCTCCCCTCCTCGGAGCGGGTGGTGGCTCGGGGTAAAAGAACCCACGGCGCCGAAGGCGTCAAGGAACACTGTGCCTAACCCGGGGGCATGGCTAGCTTGCTAGCCGTCCCTTGTGTTGCAAAGCTATTTAATCCACACGACTCTCGGCAACGGATATCTCGGCTCTCGCATCGATGAAGAACGTAGCGAAATGCGATACCTGGTGTGAATTGCAGAATCCCGCGAACCATCGAGTCTTTGAACGCAAGTTGCGCCCGAGGCCACTCGGCCGAGGGCACGCCTGCCTGGGCGTCACGCCAAAACACGCTCC…
>M006
GTCGTGACCCTGACCAAAACAGACCGCGCACGCGTCATCCAATCCGTCGGTGACGGCACTGTCCGTCGCTCGGCCAATGCCTCGACCACCTCCCCTCCTCGGAGCGGGTGGTGGCTCGGGGTAAAAGAACCCACGGCGCCGAAGGCGTCAAGGAACACTGTGCCTAACCCGGGGGCATGGCTAGCTTGCTAGCCGTCCCTTGTGTTGCAAAGCTATTTAATCCACACGACTCTCGGCAACGGATATCTCGGCTCTCGCATCGATGAAGAACGTAGCGAAATGCGATACCTGGTGTGAATTGCAGAATCCCGCGAACCATCGAGTCTTTGAACGCAAGTTGCGCCCGAGGCCACTCGGCCGAGGGCACGCCTGCCTGGGCGTCACGCCAAAACACGCTCC…
>S026
GTCGTGACCCTGACCAAAACAGACCGCGCACGCGTCATCCAATCCGTCGGTGACGGCACTGTCCGTCGCTCGGCCAATGCCTCGACCACCTCCCCTCCTTGGAGCGGATGGGGGCTCGGGGTAAAAGAACCCACGGCGCCGAAGGCGTCAAGGAACACTGTGCCTAACCCGGGGGCATGGCTAGCTTGCTAGCCGTCCCTTGTGTTGCAAAGCTATTTAATCCACACGACTCTCGGCAACGGATATCTCGGCTCTCGCATCGATGAAGAACGTAGCGAAATGCGATACCTGGTGTGAATTGCAGAATCCCGCGAACCATCGAGTCTTTGAACGCAAGTTGCGCCCGAGGCCACTCGGCCGAGGGCACGCCTGCCTGGGCGTCACGCCAAAACACGCTCC…
>S023
GTCGTGACCCTGACCAAAACAGACCGCGCACGCGTCATCCAACCCGTCGGTGACGGCACTGTCCGTCGCTCGGCCAATGCCTCGACCACCTCCCCTCCTCGGAGCGGGTGGGGGCTCGGGGTAAAAGAACCCACGGCGCCGAAGGCGTCAAGGAACACTGTGCCTAACCCGGGGGCATGGCTAGCTTGCTAGCCGTCCCTTGTGTTGCAAAGCTATTTAATCCACACGACTCTCGGCAACGGATATCTCGGCTCTCGCATCGATGAAGAACGTAGCGAAATGCGATACCTGGTGTGAATTGCAGAATCCCGCGAACCATCGAGTCTTTGAACGCAAGTTGCGCCCGAGGCCACTCGGCCGAGGGCACGCCTGCCTGGGCGTCACGCCAAAACACGCTCC…
>A018
GTCGTGACCCTGACCAAAACAGACCGCGCACGCGTCATCCAATCCGTCGGTGACGGCACTGTCCGTCGCTCGGCCAATGCCTCGACCACCTCCCCTCCTCGGAGCGGGTGGTGGCTCGGGGTAAAAGAACCCACGGCGCCGAAGGCGTCAAGGAACACTGTGCCTAACCCGGGGGCATGGCTAGCTTGCTAGCCGTCCCTTGTGTTGCAAAACTATTTAATCCACACGACTCTCGGCAACGGATATCTCGGCTCTCGCATCGATGAAGAACGTAGCGAAATGCGATACCTGGTGTGAATTGCAGAATCCCGCGAACCATCGAGTCTTTGAACGCAAGTTGCGCCCGAGGCCACTCGGCCGAGGGCACGCCTGCCTGGGCGTCACGCCAAAACACGCTCC…
>M025
GTCGTGACCCTGACCAAAACAGACCGCGCACGCGTCATCCAATCCGTCGGTGACGGCACTGTCCGTCGCTCGGCCAATGCCTCGACCACCTCCCCTCCTCGGAGCGGGTGGTGGCTCGGGGTAAAAGAACCCACGGCGCCGAAGGCGTCAAGGAACACTGTGCCTAACCCGGGGGCATGGCTAGCTTGCTAGCCGTCCCTTGTGTTGCAAAGCTATTTAATCCACACGACTCTCGGCAACGGATATCTCGGCTCTCGCATCGATGAAGAACGTAGCGAAATGCGATACCTGGTGTGAATTGCAGAATCCCGCGAACCATCGAGTCTTTGAACGCAAGTTGCGCCCGAGGCCACTCGGCCGAGGGCACGCCTGCCTGGGCGTCACGCCAAAACACGCTCC…
>S010
GTCGTGACCCTGACCAAAACAGACCGCGCACGCGTCATCCAATCCGTCGGTGACGGCACTGTCCGTCGCTCGGCCAATGCCTCGACCACCTCCCCTCCTCGGAGCGGGTGGTGGCTCGGGGTAAAAGAACCCACGGCGCCGAAGGCGTCAAGGAACACTGTGCCTAACCCGGGGGCATGGCTAGCTTGCTAGCCGTCCCTTGTGTTGCAAAGCTATTTAATCCACACGACTCTCGGCAACGGATATCTCGGCTCTCGCATCGATGAAGAACGTAGCGAAATGCGATACCTGGTGTGAATTGCAGAATCCCGCGAACCATCGAGTCTTTGAACGCAAGTTGCGCCCGAGGCCACTCGGCCGAGGGCACGCCTGCCTGGGCGTCACGCCAAAACACGCTCC…
>S016
GTCGTGACCCTGACCAAAACAGACCGCGCACGCGTCATCCAATCCGTCGGTGACGGCACTGTCCGTCGCTCGGCCAATGCCTCGACCACCTCCCCTCCTTGGAGCGGATGGGGGCTCGGGGTAAAAGAACCCACGGCGCCGAAGGCGTCAAGGAACACTGTGCCTAACCCGGGGGCATGGCTAGCTTGCTAGCCGTCCCTTGTGTTGCAAAGCTATTTAATCCACACGACTCTCGGCAACGGATATCTCGGCTCTCGCATCGATGAAGAACGTAGCGAAATGCGATACCTGGTGTGAATTGCAGAATCCCGCGAACCATCGAGTCTTTGAACGCAAGTTGCGCCCGAGGCCACTCGGCCGAGGGCACGCCTGCCTGGGCGTCACGCCAAAACACGCTCC…
>A029
GTCGTGACCCTGACCAAAACAGACCGCGCACGCGTCATCCAATCCGTCGGTGACGGCACTGTCCGTCGCTCGGCCAATGCCTCGACCACCTCCCCTCCTCGGAGCGGGTGGTGGCTCGGGGTAAAAGAACCCACGGCGCCGAAGGCGTCAAGGAACACTGTGCCTAACCCGGGGGCATGGCTAGCTTGCTAGCCGTCCCTTGTGTTGCAAAGCTATTTAATCCACACGACTCTCGGCAACGGATATCTCGGCTCTCGCATCGATGAAGAACGTAGCGAAATGCGATACCTGGTGTGAATTGCAGAATCCCGCGAACCATCGAGTCTTTGAACGCAAGTTGCGCCCGAGGCCACTCGGCCGAGGGCACGCCTGCCTGGGCGTCACGCCAAAACACGCTCC…
>A017
GTCGTGACCCTGACCAAAACAGACCGCGCACGCGTCATCCAATCCGTCGGTGACGGCACTGTCCGTCGCTCGGCCAATGCCTCGACCACCTCCCCTCCTCGGAGCGGGTGGTGGCTCGGGGTAAAAGAACCCACGGCGCCGAAGGCGTCAAGGAACACTGTGCCTAACCCGGGGGCATGGCTAGCTTGCTAGCCGTCCCTTGTGTTGCAAAGCTATTTAATCCACACGACTCTCGGCAACGGATATCTCGGCTCTCGCATCGATGAAGAACGTAGCGAAATGCGATACCTGGTGTGAATTGCAGAATCCCGCGAACCATCGAGTCTTTGAACGCAAGTTGCGCCCGAGGCCACTCGGCCGAGGGCACGCCTGCCTGGGCGTCACGCCAAAACACGCTCC…
>M002
GTCGTGACCCTGACCAAAACAGACCGCGCACGCGTCATCCAATCCGTCGGTGACGGCACTGTCCGTCGCTCGGCCAATGCCTCGACCACCTCCCCTCCTCGGAGCGGGTGGTGGCTCGGGGTAAAAGAACCCACGGCGCCGAAGGCGTCAAGGAACACTGTGCCTAACCCGGGGGCATGGCTAGCTTGCTAGCCGTCCCTTGTGTTGCAAAGCTATTTAATCCACACGACTCTCGGCAACGGATATCTCGGCTCTCGCATCGATGAAGAACGTAGCGAAATGCGATACCTGGTGTGAATTGCAGAATCCCGCGAACCATCGAGTCTTTGAACGCAAGTTGCGCCCGAGGCCACTCGGCCGAGGGCACGCCTGCCTGGGCGTCACGCCAAAACACGCTCC…
>S015
GTCGTGACCCTGACCAAAACAGACCGCGCACGCGTCATCCAATCCGTCGGTGACGGCACTGTCCGTCGCTCGGCCAATGCCTCGACCACCTCCCCTCCTTGGAGCGGATGGGGGCTCGGGGTAAAAGAACCCACGGCGCCGAAGGCGTCAAGGAACACTGTGCCTAACCCGGGGGCATGGCTAGCTTGCTAGCCGTCCCTTGTGTTGCAAAGCTATTTAATCCACACGACTCTCGGCAACGGATATCTCGGCTCTCGCATCGATGAAGAACGTAGCGAAATGCGATACCTGGTGTGAATTGCAGAATCCCGCGAACCATCGAGTCTTTGAACGCAAGTTGCGCCCGAGGCCACTCGGCCGAGGGCACGCCTGCCTGGGCGTCACGCCAAAACACGCTCC…
>A030
GTCGTGACCCTGACCAAAACAGACCGCGCACGCGTCATCCAATCCGTCGGTGACGGCACTGTCCGTCGCTCGGCCAATGCCTCGACCACCTCCCCTCCTCGGAGCGGGTGGTGGCTCGGGGTAAAAGAACCCACGGCGCCGAAGGCGTCAAGGAACACTGTGCCTAACCCGGGGGCATGGCTAGCTTGCTAGCCGTCCCTTGTGTTGCAAAGCTATTTAATCCACACGACTCTCGGCAACGGATATCTCGGCTCTCGCATCGATGAAGAACGTAGCGAAATGCGATACCTGGTGTGAATTGCAGAATCCCGCGAACCATCGAGTCTTTGAACGCAAGTTGCGCCCGAGGCCACTCGGCCGAGGGCACGCCTGCCTGGGCGTCACGCCAAAACACGCTCC…
>M004
GTCGTGACCCTGACCAAAACAGACCGCGCACGCGTCATCCAATCCGTCGGTGACGGCACTGTCCGTCGCTCGGCCAATGCCTCGACCACCTCCCCTCCTCGGAGCGGGTGGTGGCTCGGGGTAAAAGAACCCACGGCGCCGAAGGCGTCAAGGAACACTGTGCCTAACCCGGGGGCATGGCTAGCTTGCTAGCCGTCCCTTGTGTTGCAAAGCTATTTAATCCACACGACTCTCGGCAACGGATATCTCGGCTCTCGCATCGATGAAGAACGTAGCGAAATGCGATACCTGGTGTGAATTGCAGAATCCCGCGAACCATCGAGTCTTTGAACGCAAGTTGCGCCCGAGGCCACTCGGCCGAGGGCACGCCTGCCTGGGCGTCACGCCAAAACACGCTCC…
>M020
GTCGTGACCCTGACCAAAACAGACCGCGCACGCGTCATCCAATCCGTCGGTGACGGCACTGTCCGTCGCTCGGCCAATGCCTCGACCACCTCCCCTCCTCGGAGCGGGTGGTGGCTCGGGGTAAAAGAACCCACGGCGCCGAAGGCGTCAAGGAACACTGTGCCTAACCCGGGGGCATGGCTAGCTTGCTAGCCGTCCCTTGTGTTGCAAAGCTATTTAATCCACACGACTCTCGGCAACGGATATCTCGGCTCTCGCATCGATGAAGAACGTAGCGAAATGCGATACCTGGTGTGAATTGCAGAATCCCGCGAACCATCGAGTCTTTGAACGCAAGTTGCGCCCGAGGCCACTCGGCCGAGGGCACGCCTGCCTGGGCGTCACGCCAAAACACGCTCC…
>S028
GTCGTGACCCTGACCAAAACAGACCGCGCACGCGTCATCCAACCCGTCGGTGACGGCACTGTCCGTCGCTCGGCCAATGCCTCGACCACCTCCCCTCCTCGGAGCGGGTGGGGGCTCGGGGTAAAAGAACCCACGGCGCCGAAGGCGTCAAGGAACACTGTGCCTAACCCGGGGGCATGGCTAGCTTGCTAGCCGTCCCTTGTGTTGCAAAGCTATTTAATCCACACGACTCTCGGCAACGGATATCTCGGCTCTCGCATCGATGAAGAACGTAGCGAAATGCGATACCTGGTGTGAATTGCAGAATCCCGCGAACCATCGAGTCTTTGAACGCAAGTTGCGCCCGAGGCCACTCGGCCGAGGGCACGCCTGCCTGGGCGTCACGCCAAAACACGCTCC…
>A027
GTCGTGACCCTGACCAAAACAGACCGCGCACGCGTCATCCAATCCGTCGGTGACGGCACTGTCCGTCGCTCGGCCAATGCCTCGACCACCTCCCCTCCTCGGAGCGGGTGGTGGCTCGGGGTAAAAGAACCCACGGCGCCGAAGGCGTCAAGGAACACTGTGCCTAACCCGGGGGCATGGCTAGCTTGCTAGCCGTCCCTTGTGTTGCAAAGCTATTTAATCCACACGACTCTCGGCAACGGATATCTCGGCTCTCGCATCGATGAAGAACGTAGCGAAATGCGATACCTGGTGTGAATTGCAGAATCCCGCGAACCATCGAGTCTTTGAACGCAAGTTGCGCCCGAGGCCACTCGGCCGAGGGCACGCCTGCCTGGGCGTCACGCCAAAACACGCTCC…
>A013
GTCGTGACCCTGACCAAAACAGACCGCGCACGCGTCATCCAATCCGTCGGTGACGGCACTGTCCGTCGCTCGGCCAATGCCTCGACCACCTCCCCTCCTCGGAGCGGGTGGTGGCTCGGGGTAAAAGAACCCACGGCGCCGAAGGCGTCAAGGAACACTGTGCCTAACCCGGGGGCATGGCTAGCTTGCTAGCCGTCCCTTGTGTTGCAAAGCTATTTAATCCACACGACTCTCGGCAACGGATATCTCGGCTCTCGCATCGATGAAGAACGTAGCGAAATGCGATACCTGGTGTGAATTGCAGAATCCCGCGAACCATCGAGTCTTTGAACGCAAGTTGCGCCCGAGGCCACTCGGCCGAGGGCACGCCTGCCTGGGCGTCACGCCAAAACACGCTCC…
>M003
GTCGTGACCCTGACCAAAACAGACCGCGCACGCGTCATCCAATCCGTCGGTGACGGCACTGTCCGTCGCTCGGCCAATGCCTCGACCACCTCCCCTCCTCGGAGCGGGTGGTGGCTCGGGGTAAAAGAACCCACGGCGCCGAAGGCGTCAAGGAACACTGTGCCTAACCCGGGGGCATGGCTAGCTTGCTAGCCGTCCCTTGTGTTGCAAAACTATTTAATCCACACGACTCTCGGCAACGGATATCTCGGCTCTCGCATCGATGAAGAACGTAGCGAAATGCGATACCTGGTGTGAATTGCAGAATCCCGCGAACCATCGAGTCTTTGAACGCAAGTTGCGCCCGAGGCCACTCGGCCGAGGGCACGCCTGCCTGGGCGTCACGCCAAAACACGCTCC…
>A012
GTCGTGACCCTGACCAAAACAGACCGCGCACGCGTCATCCAATCCGTCGGTGACGGCACTGTCCGTCGCTCGGCCAATGCCTCGACCACCTCCCCTCCTCGGAGCGGGTGGTGGCTCGGGGTAAAAGAACCCACGGCGCCGAAGGCGTCAAGGAACACTGTGCCTAACCCGGGGGCATGGCTAGCTTGCTAGCCGTCCCTTGTGTTGCAAAACTATTTAATCCACACGACTCTCGGCAACGGATATCTCGGCTCTCGCATCGATGAAGAACGTAGCGAAATGCGATACCTGGTGTGAATTGCAGAATCCCGCGAACCATCGAGTCTTTGAACGCAAGTTGCGCCCGAGGCCACTCGGCCGAGGGCACGCCTGCCTGGGCGTCACGCCAAAACACGCTCC…
>A024
GTCGTGACCCTGACCAAAACAGACCGCGCACGCGTCATCCAATCCGTCGGTGACGGCACTGTCCGTCGCTCGGCCAATGCCTCGACCACCTCCCCTCCTCGGAGCGGGTGGGGGCTCGTGGTAAAAGAACCCACGGCGCCGAAGGCGTCAAGGAACACTGTGCCTAACACGGGGGCATGGCTAGCTTGCTAGCCGTCCCTTGTGTTGCAAAGCTATTTAATCCACACGACTCTCGGCAACGGATATCTCGGCTCTCGCATCGATGAAGAACGTAGCGAAATGCGATACCTGGTGTGAATTGCAGAATCCCGCGAACCATCGAGTCTTTGAACGCAAGTTGCGCCCGAGGCCACTCGGCCGAGGGCACGCCTGCCTGGGCGTCACGCCAAAACACGCTCC…
>M011
GTCGTGACCCTGACCAAAACAGACCGCGCACGCGTCATCCAATCCGTCGGTGACGGCACTGTCCGTCGCTCGGCCAATGCCTCGACCACCTCCCCTCCTCGGAGCGGGTGGTGGCTCGGGGTAAAAGAACCCACGGCGCCGAAGGCGTCAAGGAACACTGTGCCTAACCCGGGGGCATGGCTAGCTTGCTAGCCGTCCCTTGTGTTGCAAAGCTATTTAATCCACACGACTCTCGGCAACGGATATCTCGGCTCTCGCATCGATGAAGAACGTAGCGAAATGCGATACCTGGTGTGAATTGCAGAATCCCGCGAACCATCGAGTCTTTGAACGCAAGTTGCGCCCGAGGCCACTCGGCCGAGGGCACGCCTGCCTGGGTGGACCGAAGATCGGGCTGCC…
>M008
GTCGTGACCCTGACCAAAACAGACCGCGCACGCGTCATCCAATCCGTCGGTGACGGCACTGTCCGTCGCTCGGCCAATGCCTCGACCACCTCCCCTCCTCGGAGCGGGTGGTGGCTCGGGGTAAAAGAACCCACGGCGCCGAAGGCGTCAAGGAACACTGTGCCTAACCCGGGGGCATGGCTAGCTTGCTAGCCGTCCCTTGTGTTGCAAAGCTATTTAATCCACACGACTCTCGGCAACGGATATCTCGGCTCTCGCATCGATGAAGAACGTAGCGAAATGCGATACCTGGTGTGAATTGCAGAATCCCGCGAACCATCGAGTCTTTGAACGCAAGTTGCGCCCGAGGCCACTCGGCCGAGGGCACGCCTGCCTGGGCGTCACGCCAAAACACGCTCC…
>M005
GTCGTGACCCTGACCAAAACAGACCGCGCACGCGTCATCCAATCCGTCGGTGACGGCACTGTCCGTCGCTCGGCCAATGCCTCGACCACCTCCCCTCCTCGGAGCGGGTGGTGGCTCGGGGTAAAAGAACCCACGGCGCCGAAGGCGTCAAGGAACACTGTGCCTAACCCGGGGGCATGGCTAGCTTGCTAGCCGTCCCTTGTGTTGCAAAGCTATTTAATCCACACGACTCTCGGCAACGGATATCTCGGCTCTCGCATCGATGAAGAACGTAGCGAAATGCGATACCTGGTGTGAATTGCAGAATCCCGCGAACCATCGAGTCTTTGAACGCAAGTTGCGCCCGAGGCCACTCGGCCGAGGGCACGCCTGCCTGGGCGTCACGCCAAAACACGCTCC…
>S014
GTCGTGACCCTGACCAAAACAGACCGCGCACGCGTCATCCAATCCGTCGGTGACGGCACTGTCCGTCGCTCGGCCAATGCCTCGACCACCTCCCCTCCTTGGAGCGGATGGGGGCTCGGGGTAAAAGAACCCACGGCGCCGAAGGCGTCAAGGAACACTGTGCCTAACCCGGGGGCATGGCTAGCTTGCTAGCCGTCCCTTGTGTTGCAAAGCTATTTAATCCACACGACTCTCGGCAACGGATATCTCGGCTCTCGCATCGATGAAGAACGTAGCGAAATGCGATACCTGGTGTGAATTGCAGAATCCCGCGAACCATCGAGTCTTTGAACGCAAGTTGCGCCCGAGGCCACTCGGCCGAGGGCACGCCTGCCTGGGCGTCACGCCAAAACACGCTCC…
>S001
GTCGTGACCCTGACCAAAACAGACCGCGCACGCGTCATCCAATCCGTCGGTGACGGCACTGTCCGTCGCTCGGCCAATGCCTCGACCACCTCCCCTCCTTGGAGCGGATGGGGGCTCGGGGTAAAAGAACCCACGGCGCCGAAGGCGTCAAGGAACACTGTGCCTAACCCGGGGGCATGGCTAGCTTGCTAGCCGTCCCTTGTGTTGCAAAGCTATTTAATCCACACGACTCTCGGCAACGGATATCTCGGCTCTCGCATCGATGAAGAACGTAGCGAAATGCGATACCTGGTGTGAATTGCAGAATCCCGCGAACCATCGAGTCTTTGAACGCAAGTTGCGCCCGAGGCCACTCGGCCGAGGGCACGCCTGCCTGGGCGTCACGCCAAAACACGCTCC…
>A019
GTCGTGACCCTGACCAAAACAGACCGCGCACGCGTCATCCAATCCGTCGGTGACGGCACTGTCCGTCGCTCGGCCAATGCCTCGACCACCTCCCCTCCTCGGAGCGGGTGGTGGCTCGGGGTAAAAGAACCCACGGCGCCGAAGGCGTCAAGGAACACTGTGCCTAACCCGGGGGCATGGCTAGCTTGCTAGCCGTCCCTTGTGTTGCAAAGCTATTTAATCCACACGACTCTCGGCAACGGATATCTCGGCTCTCGCATCGATGAAGAACGTAGCGAAATGCGATACCTGGTGTGAATTGCAGAATCCCGCGAACCATCGAGTCTTTGAACGCAAGTTGCGCCCGAGGCCACTCGGCCGAGGGCACGCCTGCCTGGGCGTCACGCCAAAACACGCTCC…
>S022
GTCGTGACCCTGACCAAAACAGACCGCGCACGCGTCATCCAACCCGTCGGTGACGGCACTGTCCGTCGCTCGGCCAATGCCTCGACCACCTCCCCTCCTCGGAGCGGGTGGGGGCTCGGGGTAAAAGAACCCACGGCGCCGAAGGCGTCAAGGAACACTGTGCCTAACCCGGGGGCATGGCTAGCTTGCTAGCCGTCCCTTGTGTTGCAAAGCTATTTAATCCACACGACTCTCGGCAACGGATATCTCGGCTCTCGCATCGATGAAGAACGTAGCGAAATGCGATACCTGGTGTGAATTGCAGAATCCCGCGAACCATCGAGTCTTTGAACGCAAGTTGCGCCCGAGGCCACTCGGCCGAGGGCACGCCTGCCTGGGCGTCACGCCAAAACACGCTCC…

## Sheet: Table S9
Table S9. SNP and transition/transversion identified from low coverage illumina read data of 29 Ae. tauschii genotypes.
Sample	N0. of SNPs	Transitions	Transversions	ts/tv			SNP statistics in all samples					%
A012	55639	36954	18677	1.98			G->C	23038		C/T	149165	0.319755
A013	58044	38466	19574	1.97			G->A	86353		A/G	147010	0.315135
A017	59989	39761	20217	1.97			A->C	19355		Total transition	296175	0.63489
A019	59438	39432	19994	1.97			A->G	60657		G/T	44437	0.0952566
A021	63319	41818	21481	1.95			C->T	88061		A/T	35523	0.0761482
A024	60391	40030	20353	1.97			T->A	17801		A/C	44284	0.0949286
A027	61589	40801	20775	1.96			T->C	61104		C/G	46079	0.0987764
A029	59254	39134	20094	1.95			C->A	24929		Total transversion	170323	0.36511
A030	61007	40287	20702	1.95			C->G	23041
M002	14606	9569	5049	1.9			A->T	17722
M003	43730	29031	14700	1.97			G->T	25381
M004	50464	33362	17109	1.95			T->G	19056
M005	55266	36523	18751	1.95
M006	54373	35997	18376	1.96
M007	57407	37947	19452	1.95			Number of SNPs on each chromosome
M008	52205	34484	17706	1.95			1D	56854
M009	56548	37435	19114	1.96			2D	78157
M011	59424	39344	20074	1.96			3D	71241
M020	59568	39357	20202	1.95			4D	47957
M025	58363	38716	19626	1.97			5D	69359
S001	7244	4708	2543	1.85			6D	58051
S010	18781	12325	6437	1.91			7D	82077
S014	14398	9374	5008	1.87
S015	14440	9399	5016	1.87
S016	14903	9701	5186	1.87
S022	22989	15285	7686	1.99
S023	17683	11462	6195	1.85
S026	14921	9714	5167	1.88
S028	26420	17536	8853	1.98
